# Supplementary material for: Resveratrol-based benzoselenophenes with an enhanced antioxidant and chain breaking capacity
Source: Royal Society of Chemistry journal article supplement (doi:10.1039/c5ob00193e), 2015-01-01
Supplement: c5ob00193e1.pdf [file c5ob00193e1.pdf]

Electronic Supplementary Information (ESI) for the article

# Resveratrol-Based Benzoselenophenes with Enhanced Antioxidant and Chain Breaking Capacity

Damiano Tanini, Lucia Panzella,\* Riccardo Amorati, Antonella Capperucci,\* Elio Pizzo,

Alessandra Napolitano, Stefano Menichetti and Marco d'Ischia

## Table of Contents

|                                                                                                                                                                                           | page |
|-------------------------------------------------------------------------------------------------------------------------------------------------------------------------------------------|------|
| NMR spectra                                                                                                                                                                               | S2   |
| <b>Table S1</b> Optimized stoichiometry ratios for the isolation of <b>1</b> , <b>2</b> and <b>3</b>                                                                                      | S15  |
| <b>Fig. S1</b> Relative percentage of resveratrol and selenophenes <b>1-3</b> vs SO <sub>2</sub> Cl <sub>2</sub> equiv in the reaction of resveratrol (0.4 equiv) with Se (0) (1.0 equiv) | S16  |
| <b>Fig. S2</b> Calculated spin densities for the 4'-OH radicals of resveratrol and <b>1</b>                                                                                               | S17  |
| <b>Table S2</b> Calculated BDE(OH) for the Se-oxide of <b>1</b>                                                                                                                           | S18  |
| Computational data                                                                                                                                                                        | S19  |

Compound 1,  $^1\text{H}$  NMR, 400MHz,  $\text{CD}_3\text{OD}$

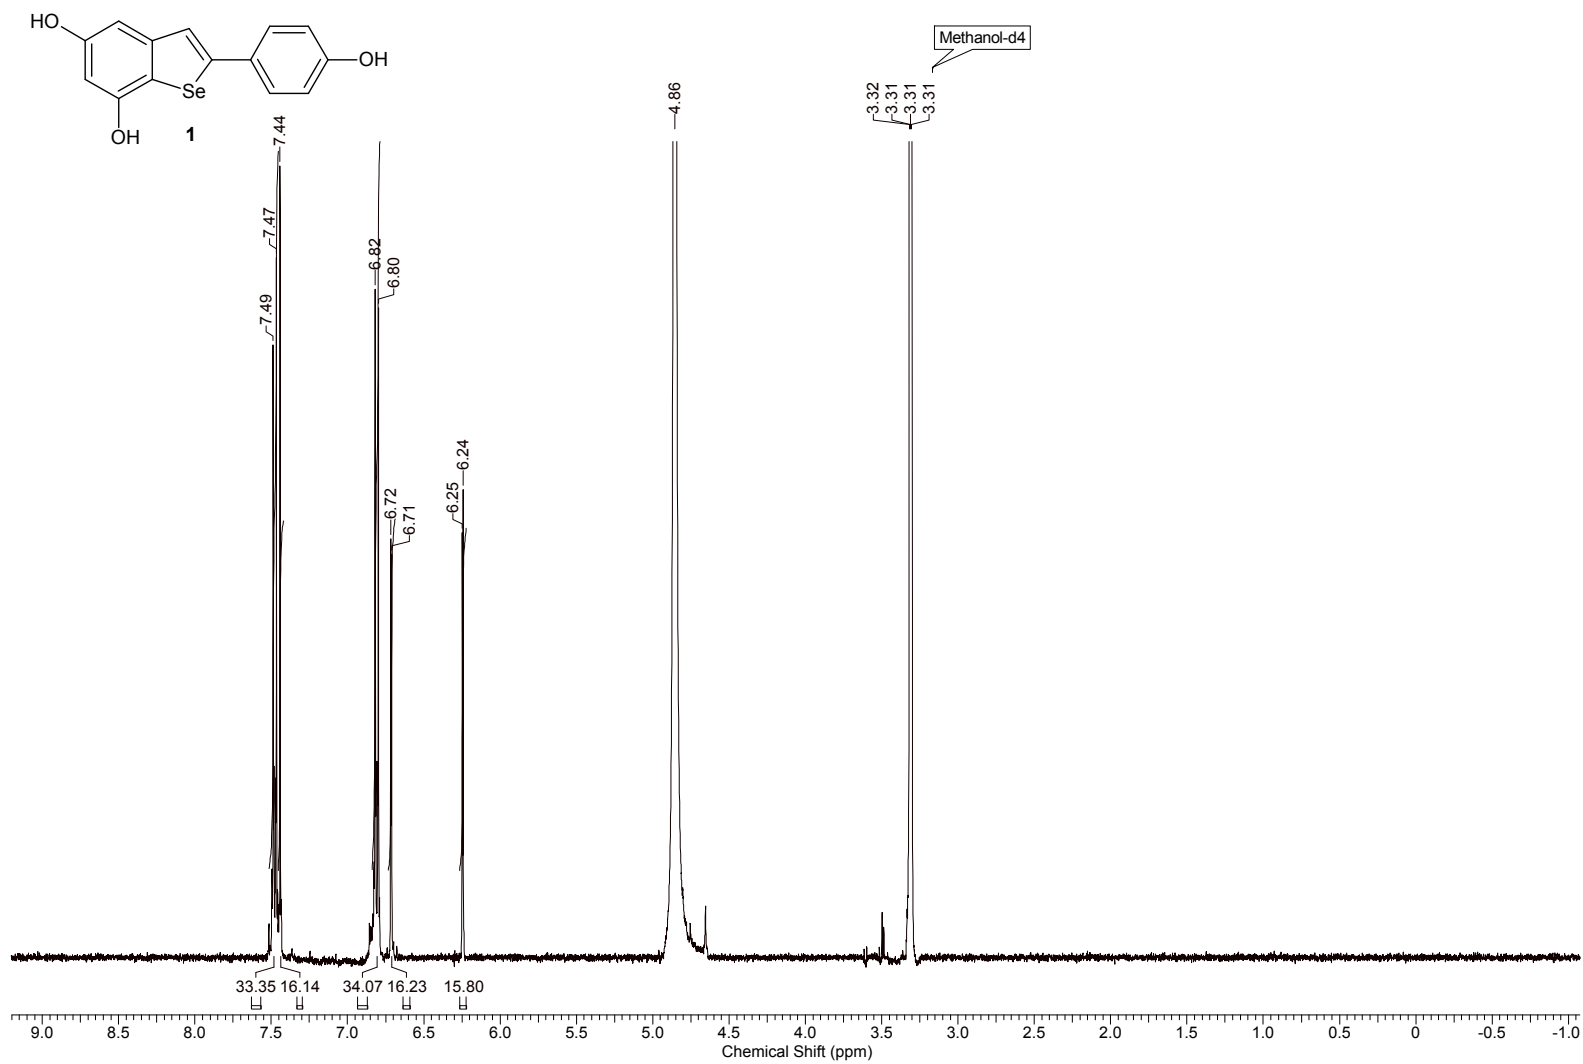

Compound 1, <sup>1</sup>H NMR (expansion), 400MHz, CD<sub>3</sub>OD

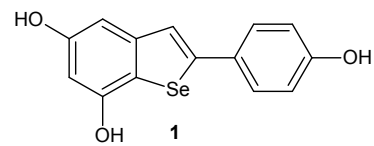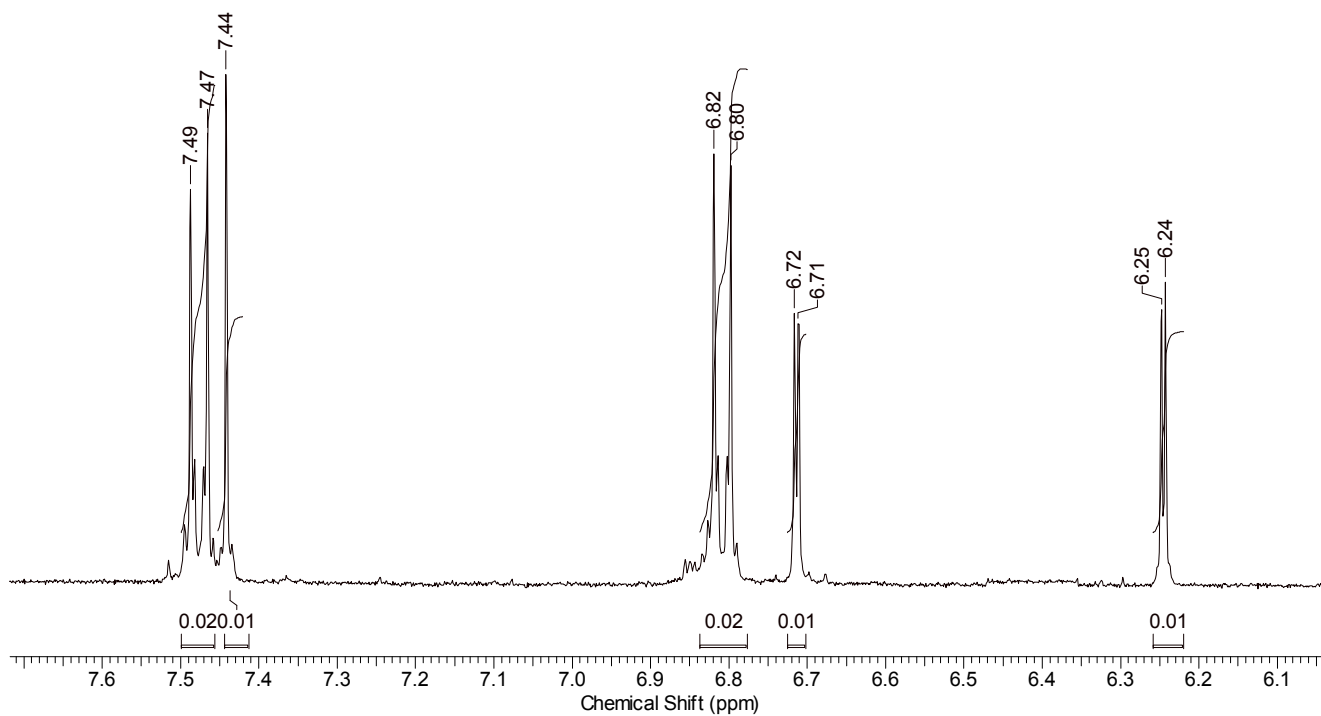

Compound **1**,  $^{13}\text{C}$  NMR, 50 MHz,  $\text{CD}_3\text{OD}$

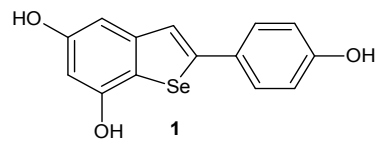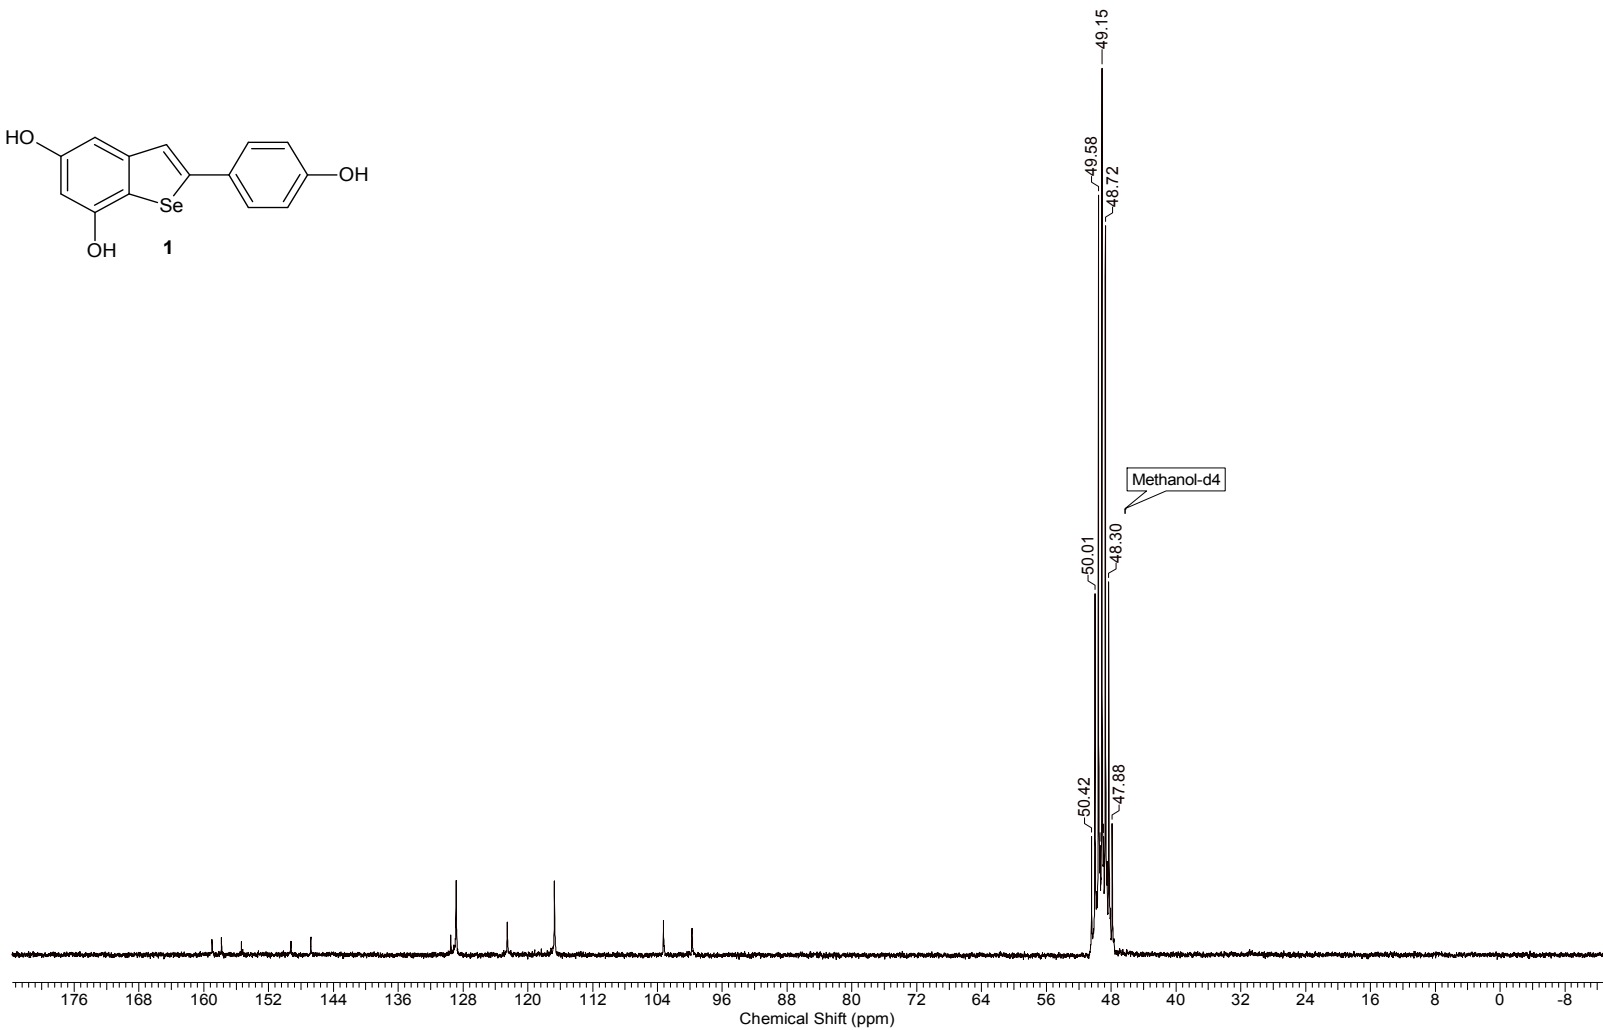

Compound **1**,  $^{13}\text{C}$  NMR (expansion), 50 MHz,  $\text{CD}_3\text{OD}$

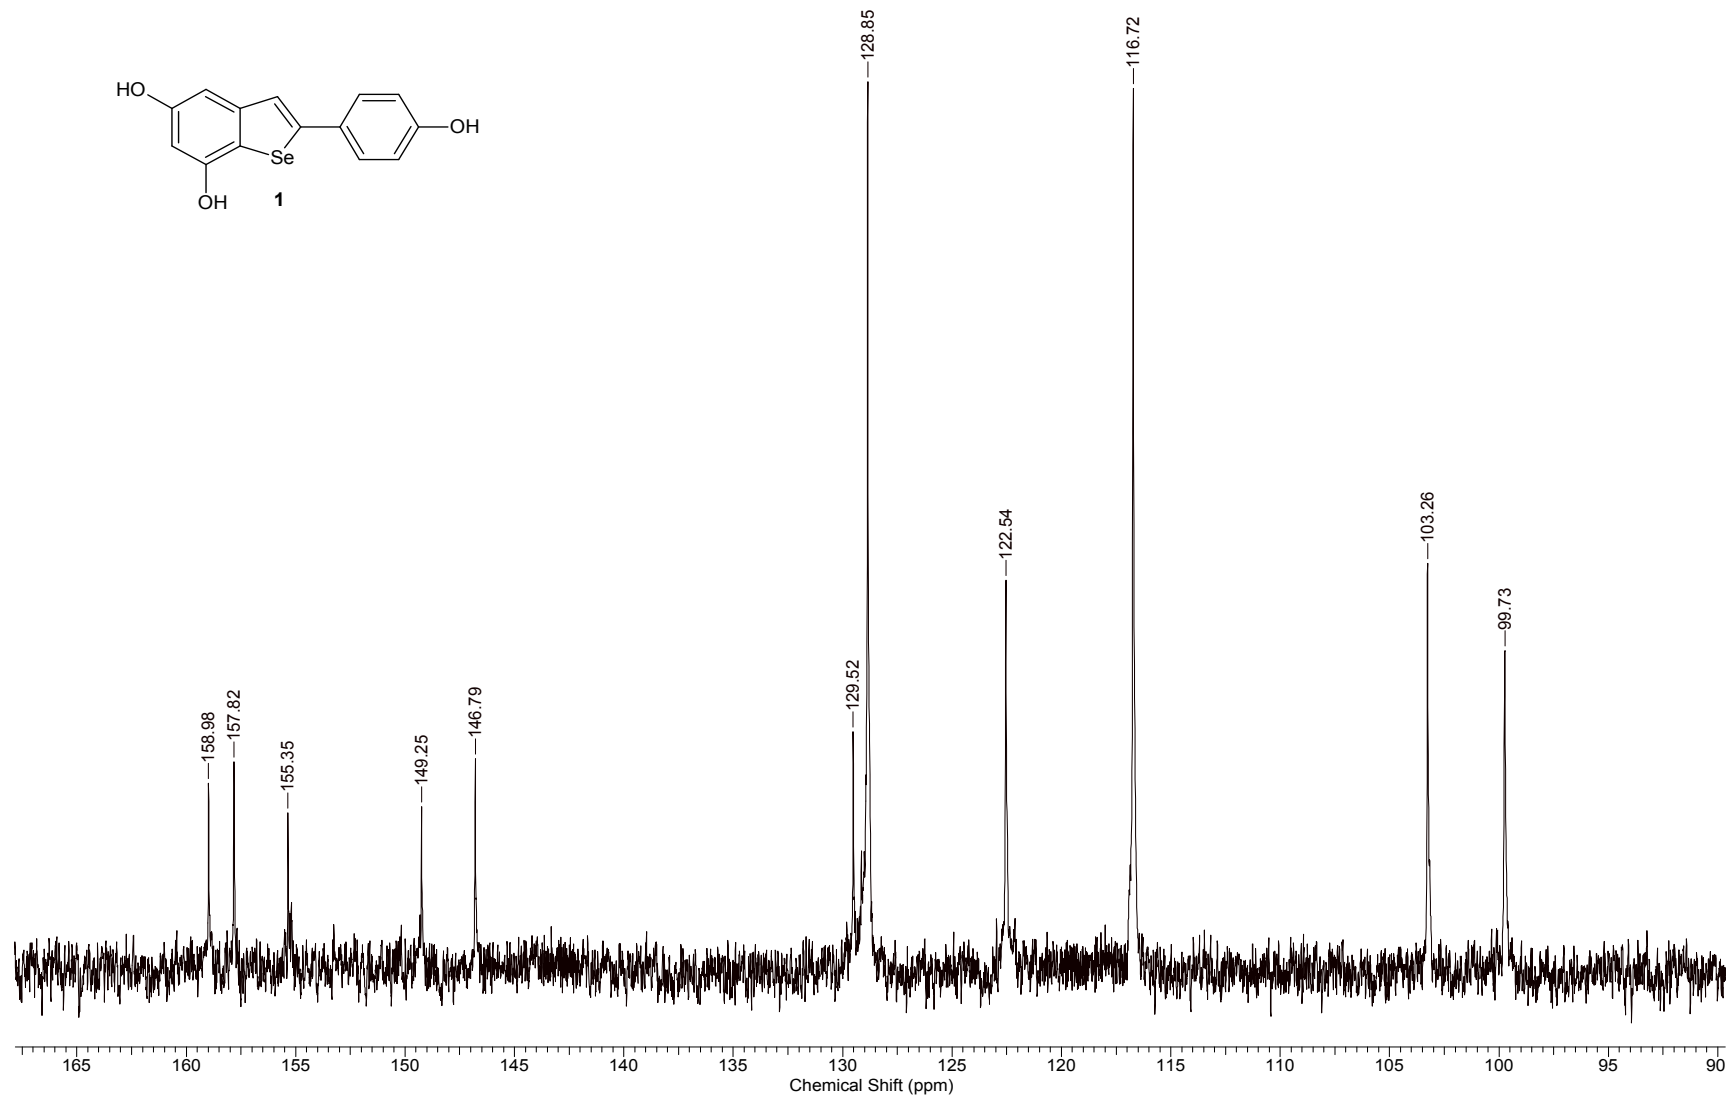

Compound 1,  $^{77}\text{Se}$  NMR, 76 MHz,  $\text{CD}_3\text{OD}$

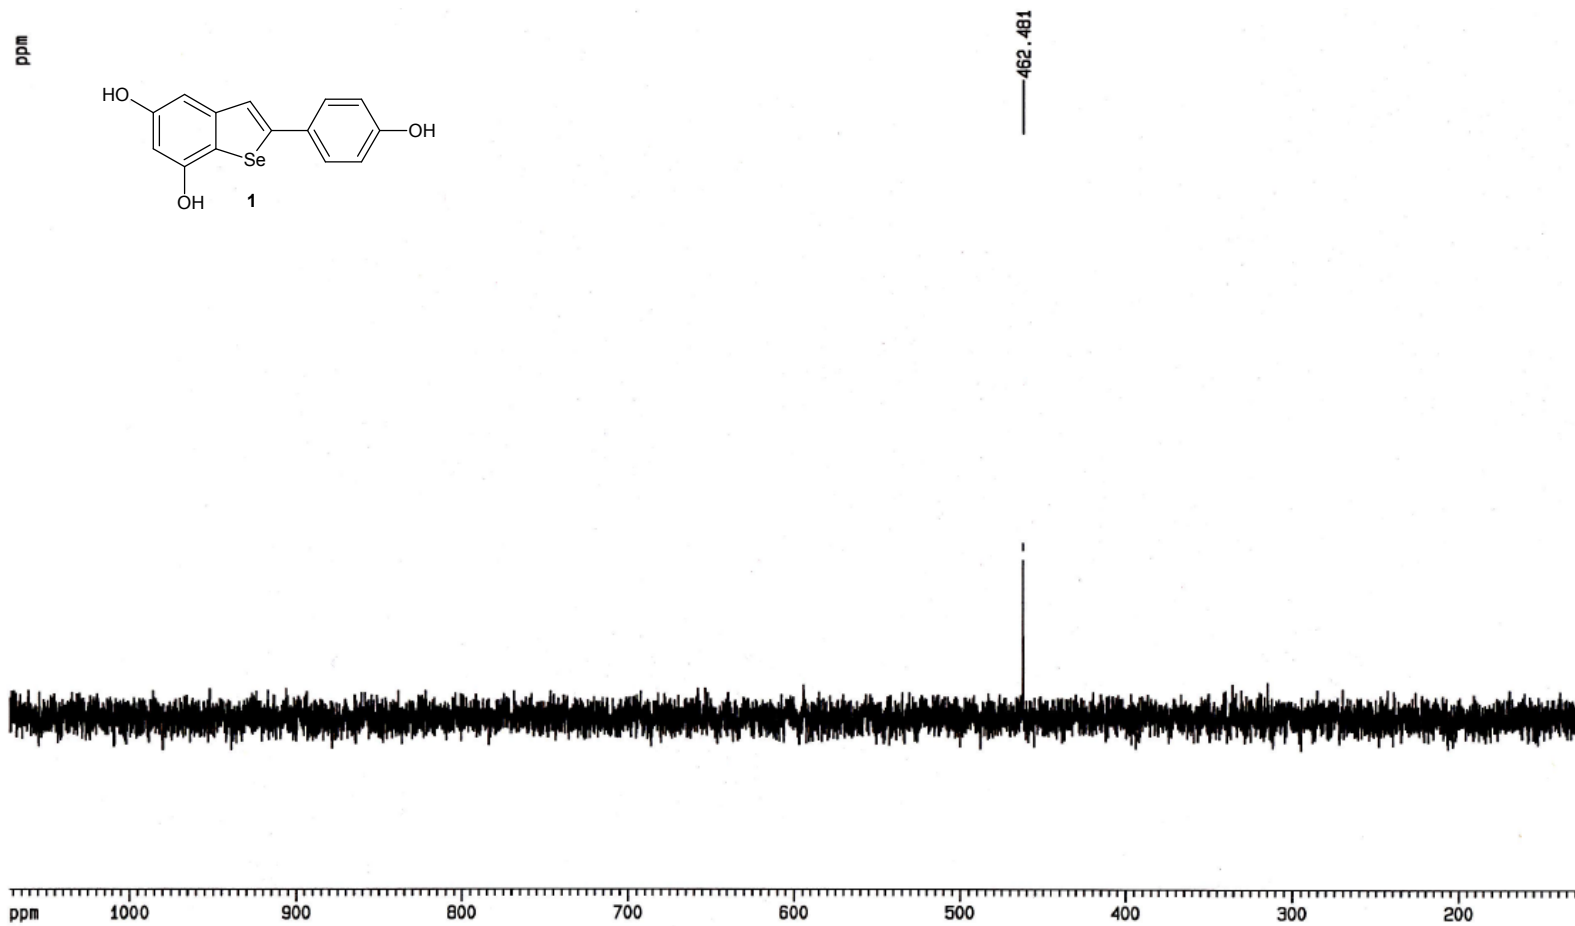

Compound 2,  $^1\text{H}$  NMR, 300 MHz,  $\text{CD}_3\text{OD}$

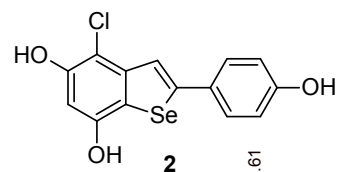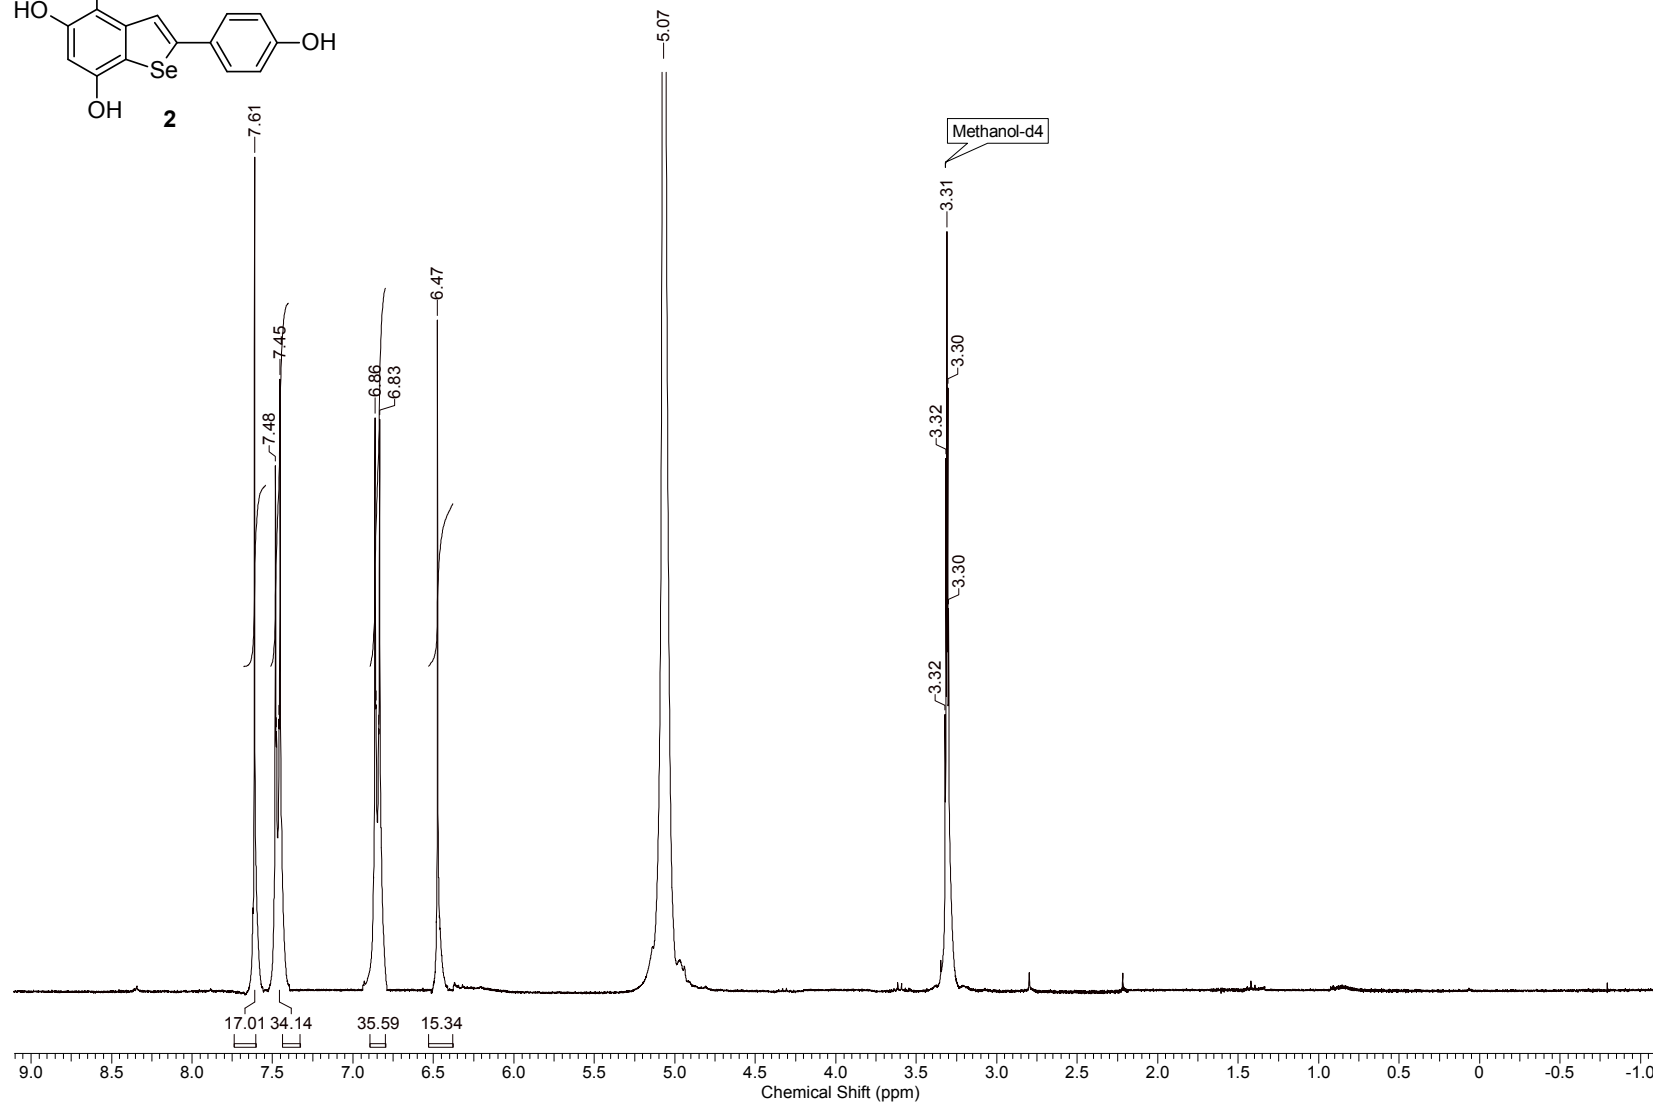

Compound **2**,  $^{13}\text{C}$  NMR, 100 MHz,  $\text{CD}_3\text{OD}$

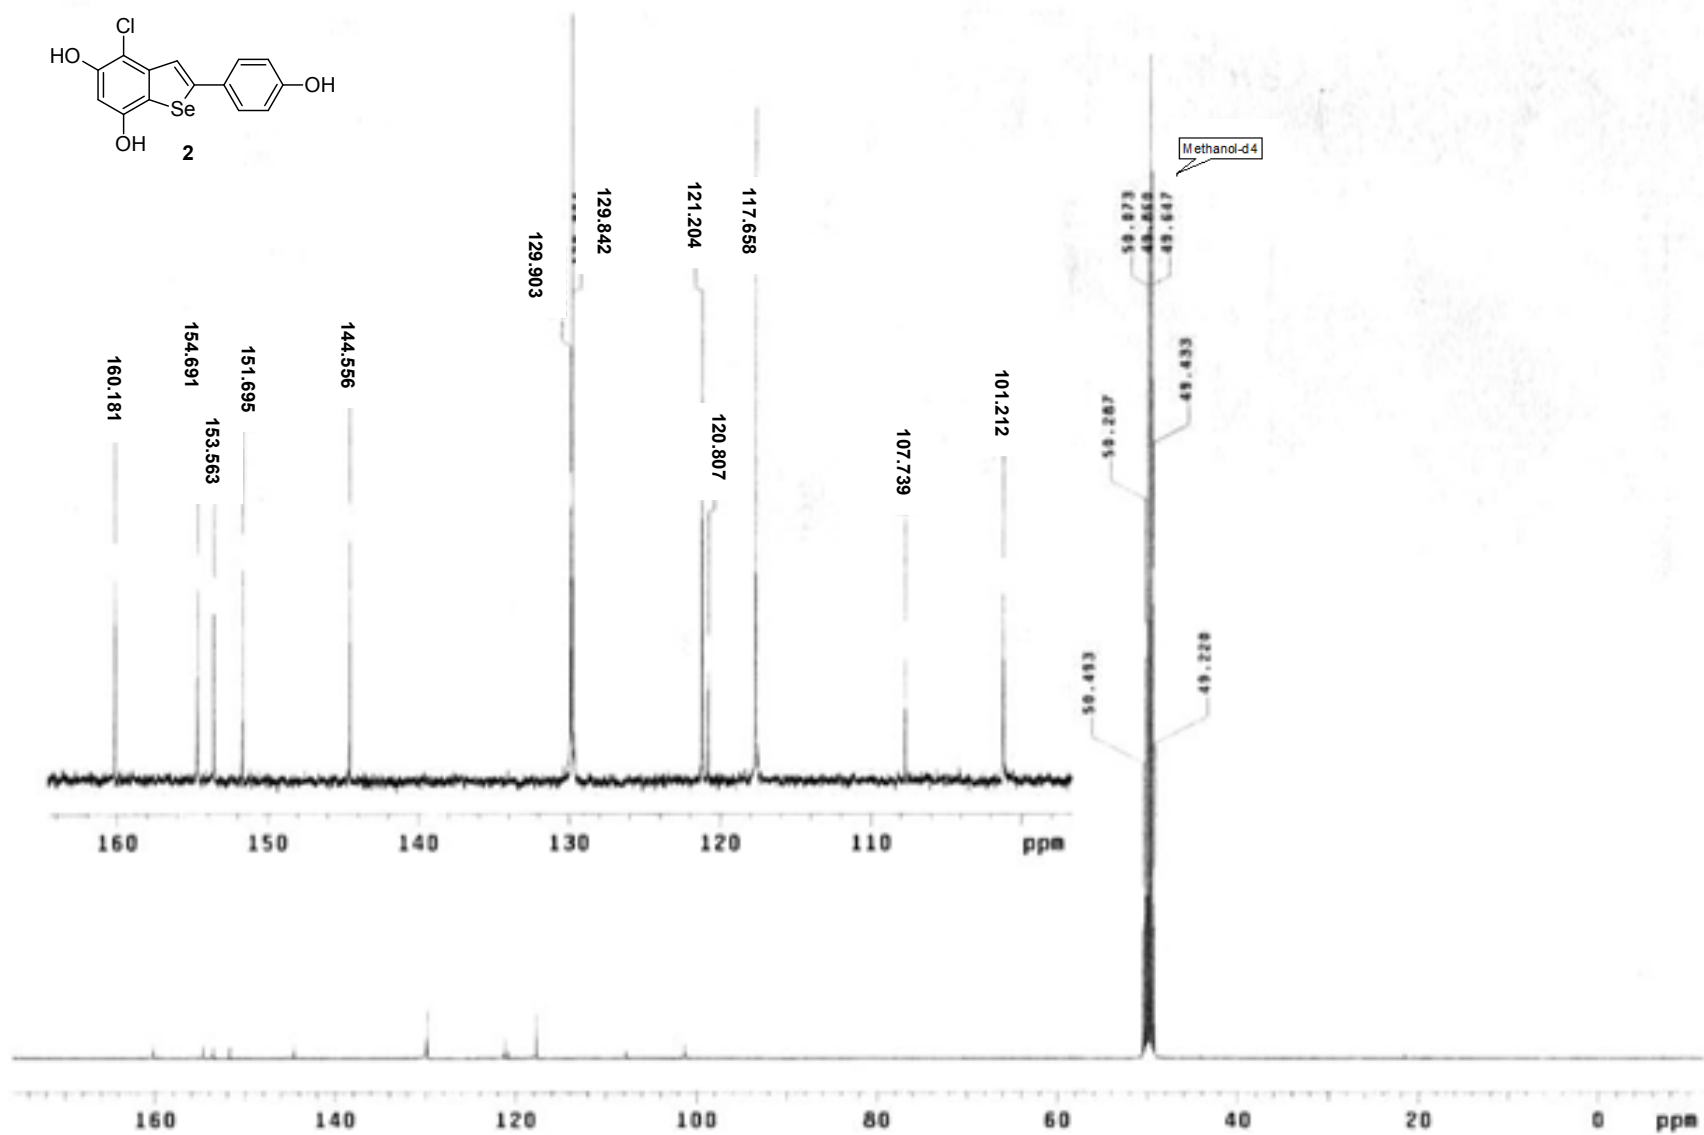



Compound **2**,  $^{77}\text{Se}$  NMR, 38 MHz,  $\text{CD}_3\text{OD}$

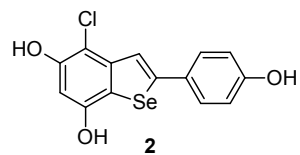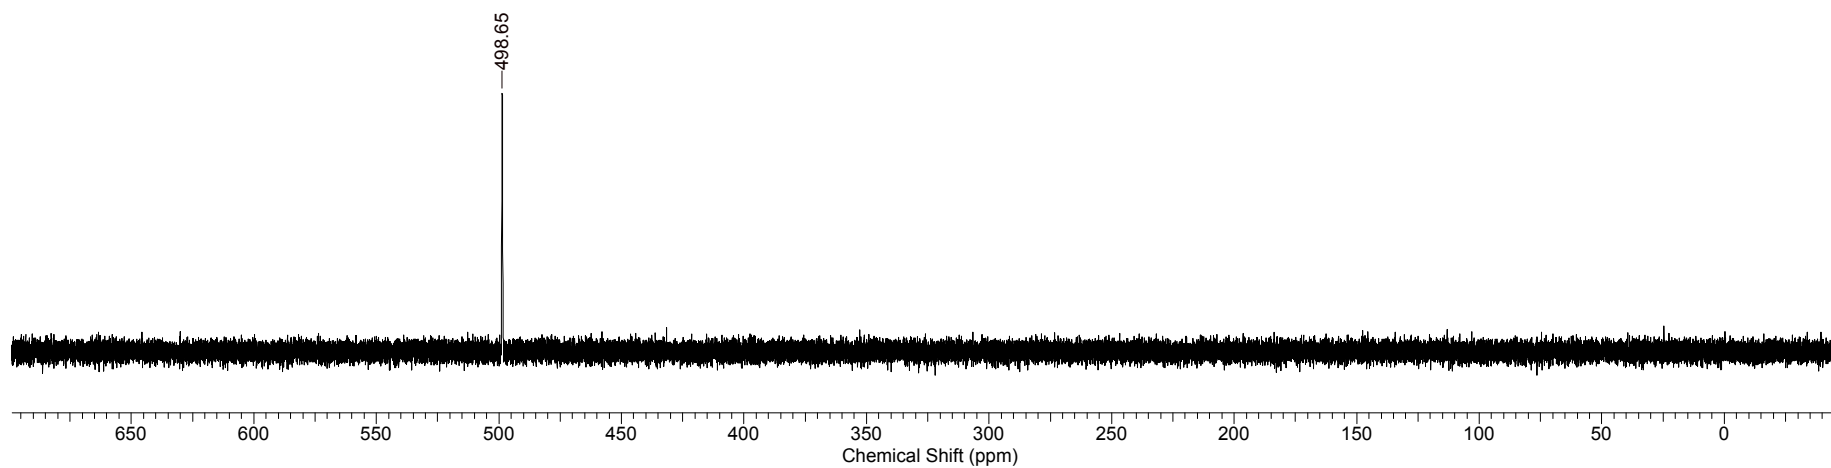

Compound **2**, region of the  $^1\text{H}$ ,  $^{13}\text{C}$  HMBC spectrum, 400 MHz,  $\text{CD}_3\text{OD}$  (arrows indicate diagnostic long-range couplings)

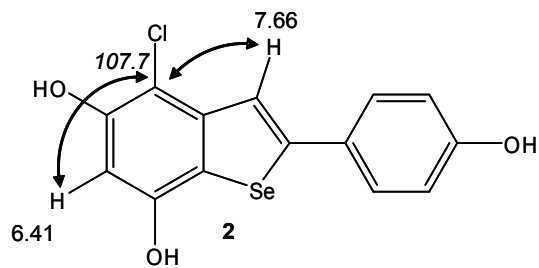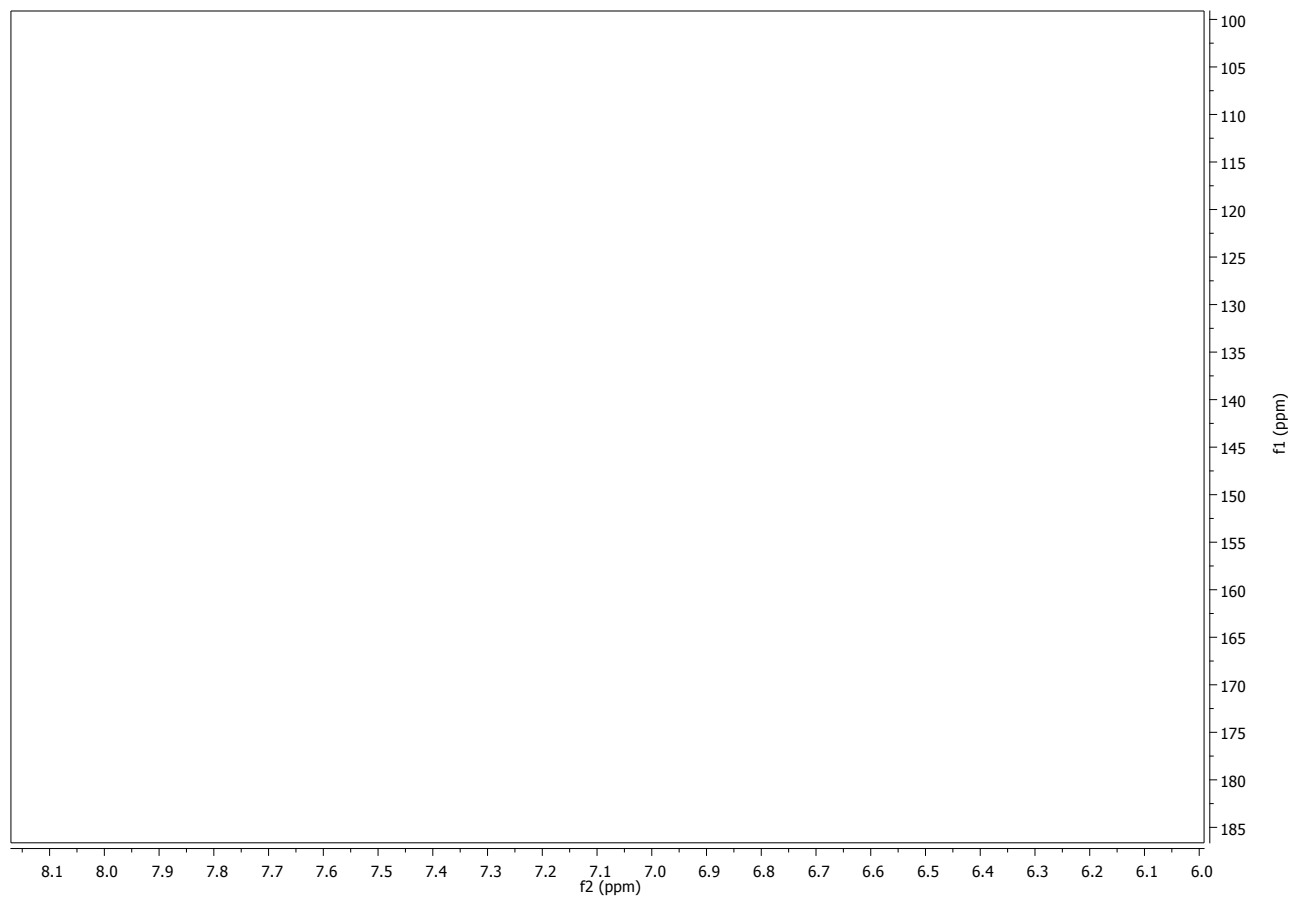

Compound **3**,  $^1\text{H}$  NMR, 200 MHz,  $\text{CD}_3\text{OD}$

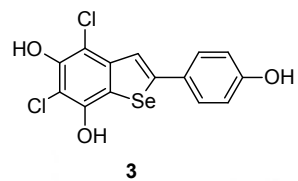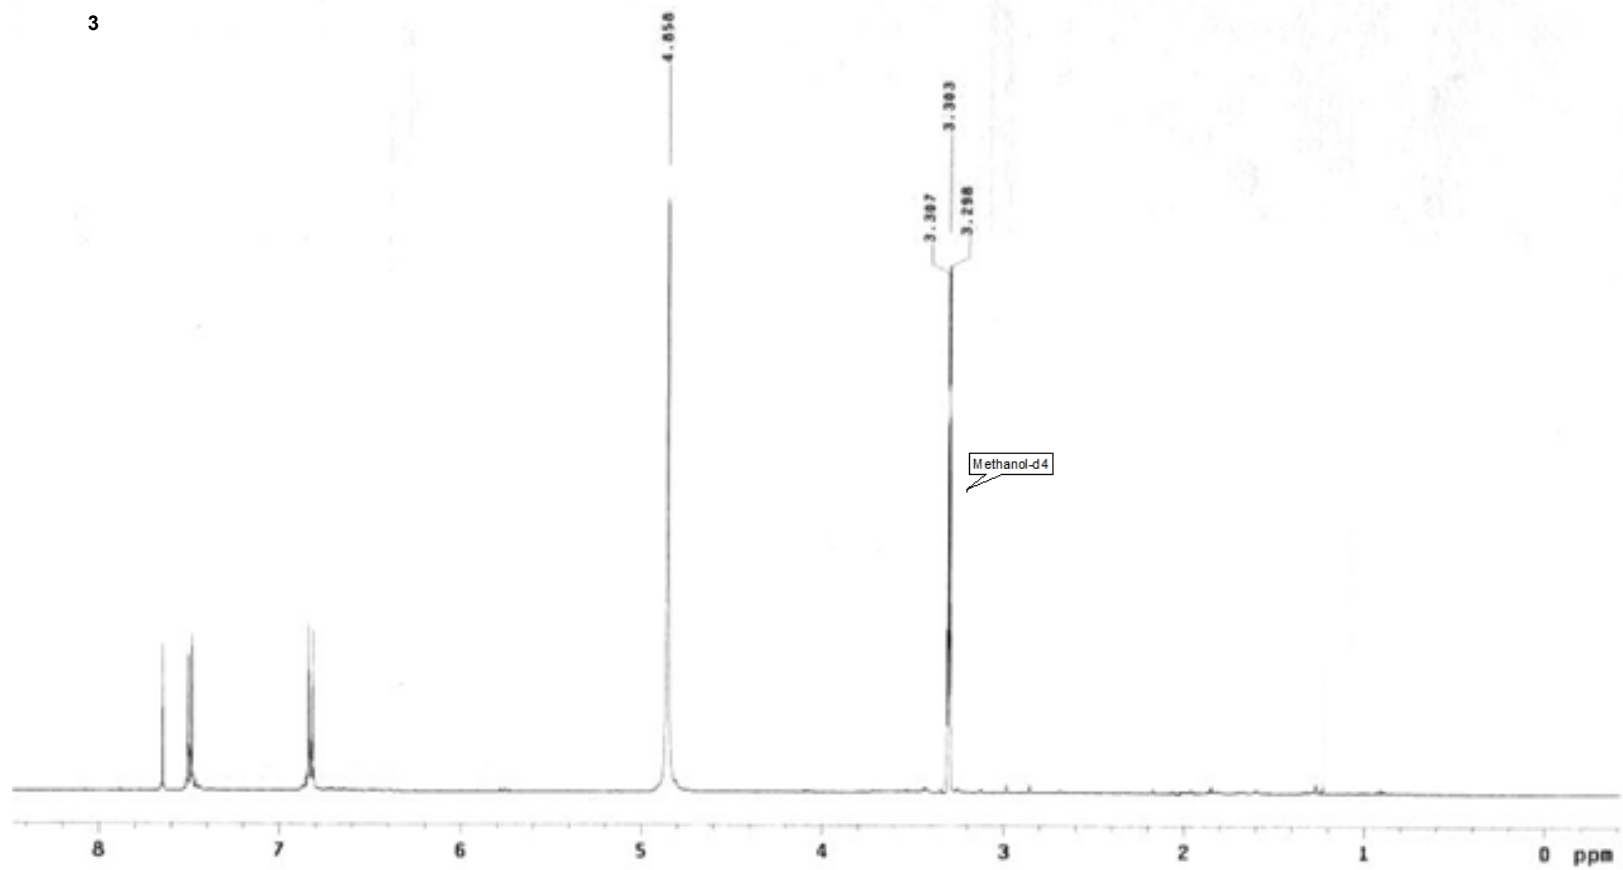

Compound **3**,  $^1\text{H}$  NMR (expansion), 200 MHz,  $\text{CD}_3\text{OD}$

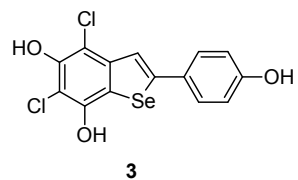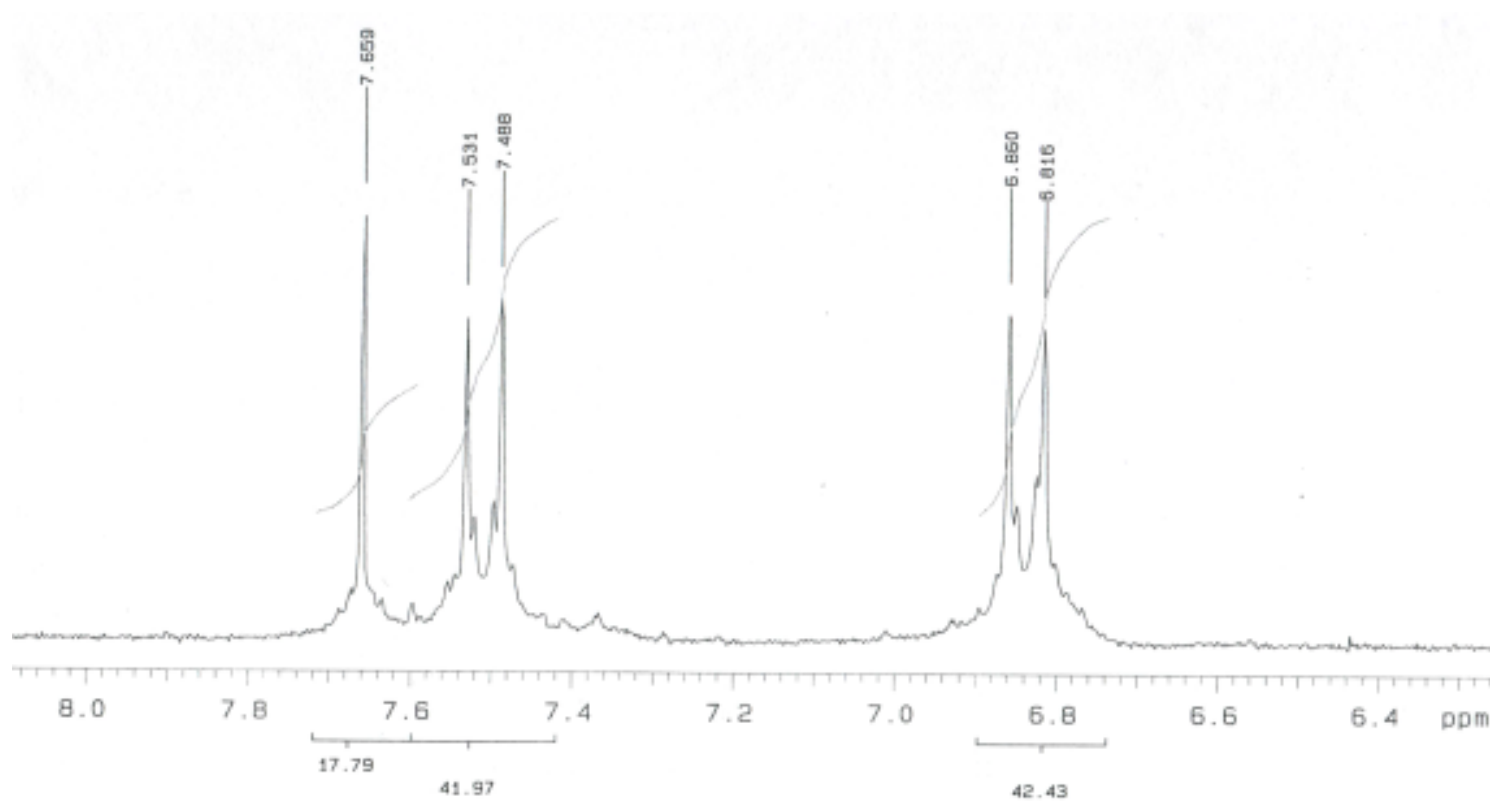

Compound **3**,  $^{13}\text{C}$  NMR, 100 MHz,  $\text{CD}_3\text{OD}$

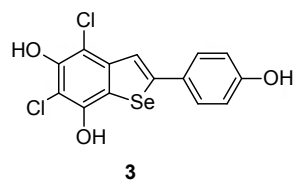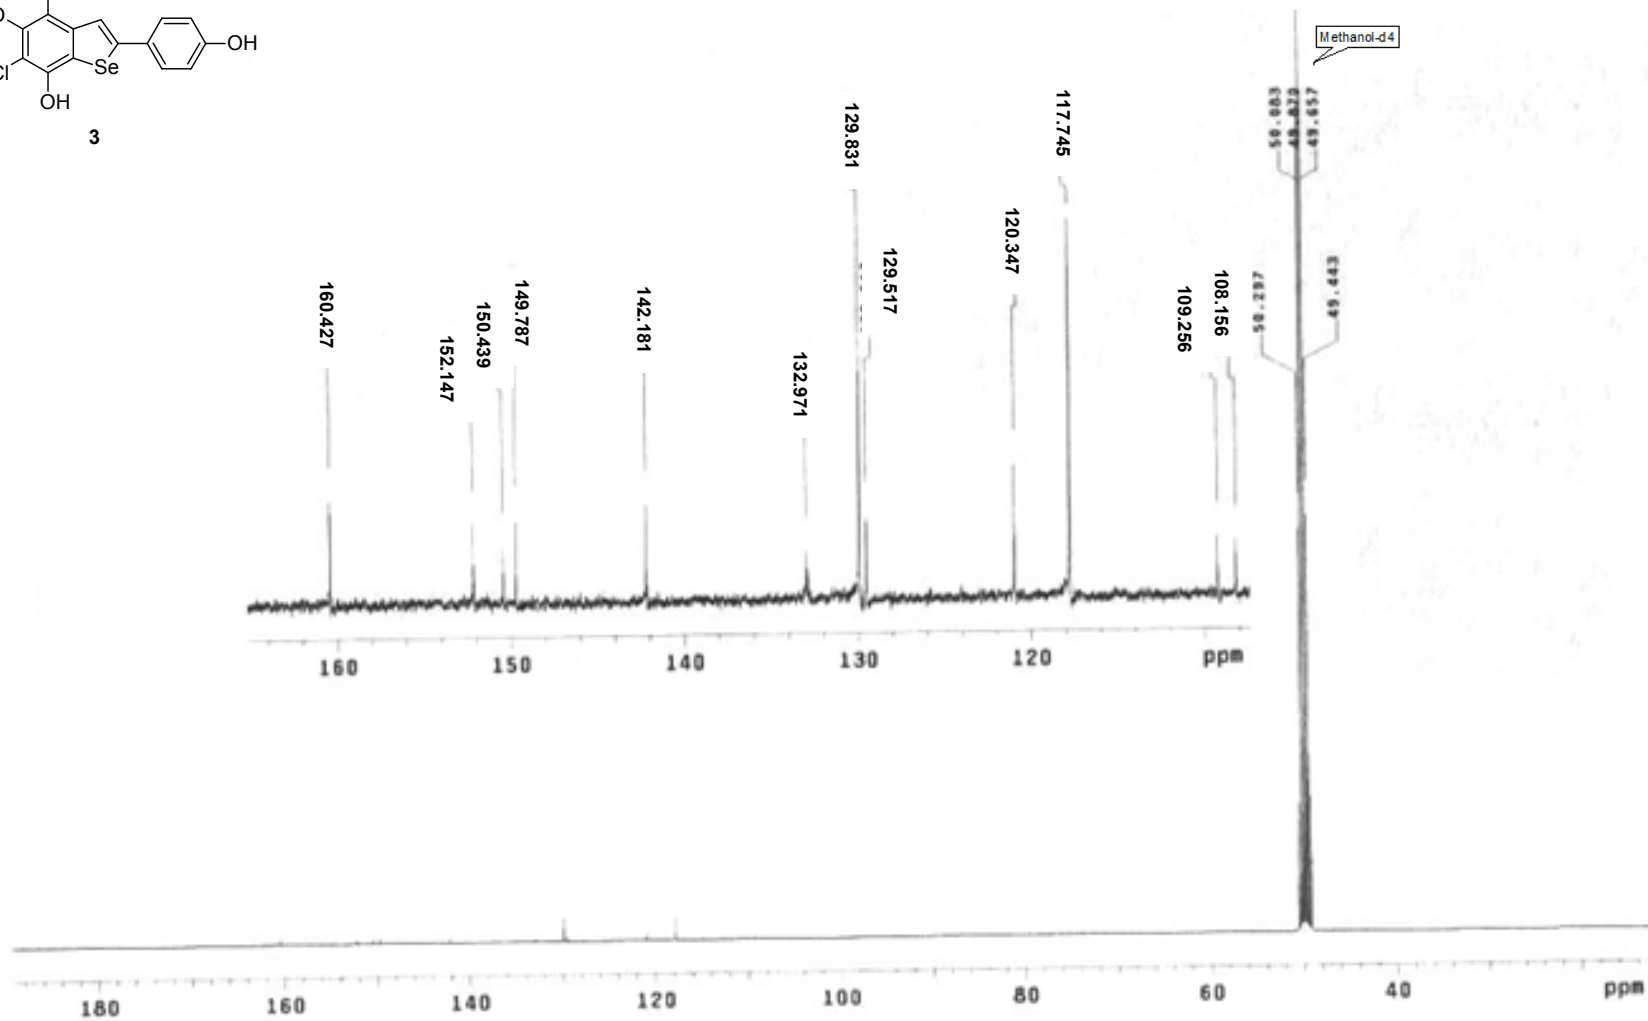

Compound **3**,  $^{77}\text{Se}$  NMR, 38 MHz,  $\text{CD}_3\text{OD}$

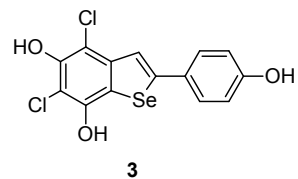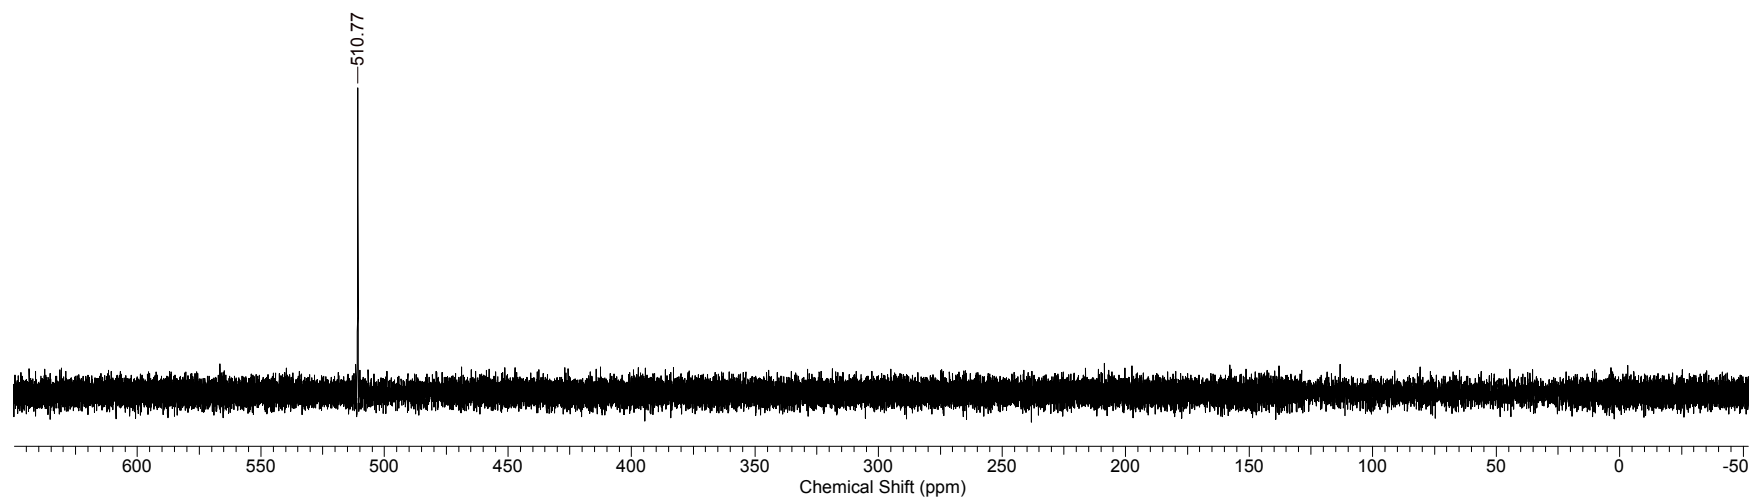

**Table S1** Optimized stoichiometry ratios for the isolation of **1**, **2** and **3**.

| Entry | Se(0)<br>equiv | SO <sub>2</sub> Cl <sub>2</sub><br>equiv | Resveratrol<br>equiv | Products           | Yield (%) <sup>a</sup> |
|-------|----------------|------------------------------------------|----------------------|--------------------|------------------------|
| 1     | 1.0            | 0.8                                      | 0.4                  | <b>1:2</b> = 70:30 | 48                     |
| 2     | 1.0            | 1.0                                      | 0.4                  | <b>2:3</b> = 85:15 | 71                     |
| 3     | 1.0            | 2.0                                      | 0.4                  | <b>3</b>           | 82                     |

<sup>a</sup>Isolated yield of major product

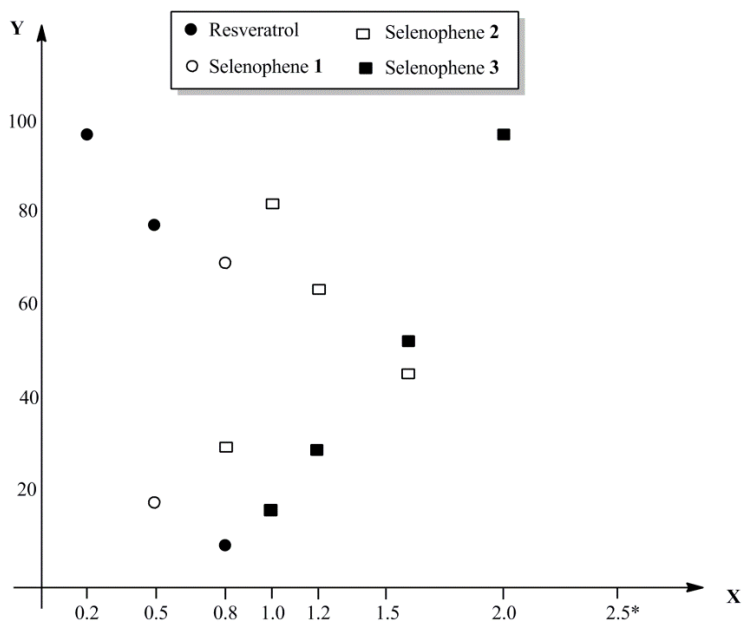

**Fig. S1** Relative percentage of resveratrol and selenophenes **1-3** vs SO<sub>2</sub>Cl<sub>2</sub> equiv in the reaction of resveratrol (0.4 equiv) with Se (0) (1.0 equiv) as determined by <sup>1</sup>H NMR analysis of the ethyl acetate extractable fraction from crude reaction mixtures after 24 h (SD ≤ 4%). With 2.5 equiv of SO<sub>2</sub>Cl<sub>2</sub> or more a complex mixture was obtained with no trace of any selenophene.



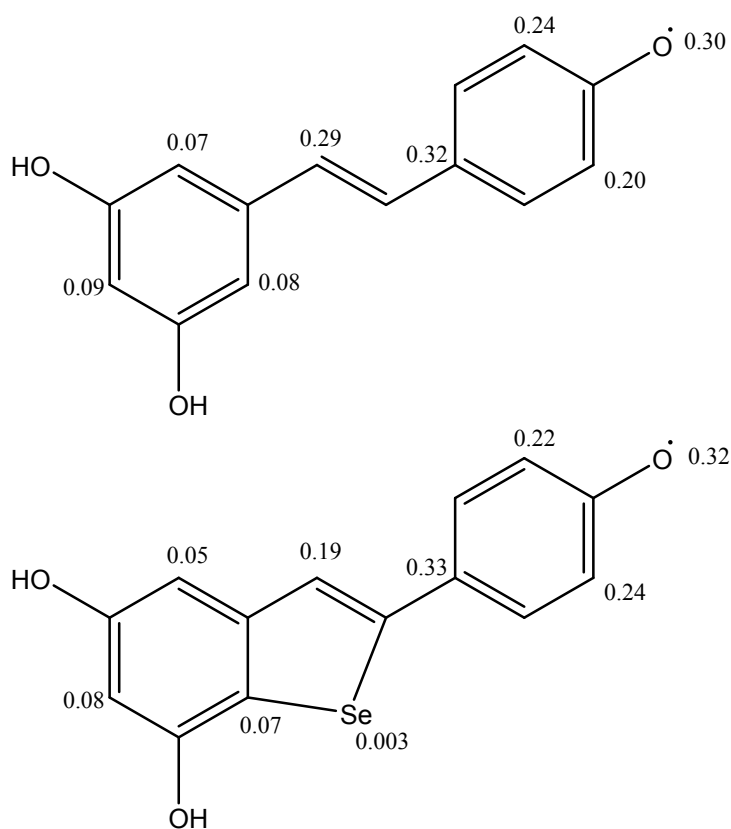

**Fig. S2** Spin densities calculated at the B3LYP/LANL2DZdp level for the 4'-OH radicals of resveratrol (upper) and **1** (lower).

**Table S2** Calculated BDE(OH) in the gas-phase at the B3LYP/LANL2DZdp level for the Se-oxide of 1

| compd                                                                             | BDE (O-H) (kcal/mol) |      |      |
|-----------------------------------------------------------------------------------|----------------------|------|------|
|                                                                                   | 4'-OH                | 3-OH | 5-OH |
| 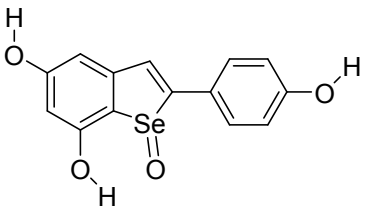 | 85.1                 | 90.7 | 87.3 |

## Computational data

resvse1

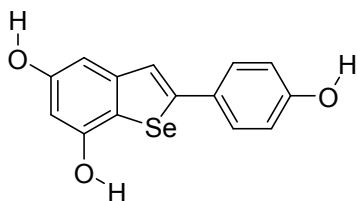

```
B3lyp/gen pseudo=read opt freq scale=0.9806\\resveratrolo Se\\0,1\C,-0
.0137509222,-0.0030460515,-0.0017462495\C,0.0131511144,-0.0010870577,1
.4107779195\C,1.2577714142,0.0025067897,2.0939587\C,2.465631923,0.0036
820414,1.3714480445\C,2.4337488079,0.0048952533,-0.0252884053\C,1.1968
408468,0.001763221,-0.699561141\C,-1.130894002,-0.0162162775,2.2922159
368\C,-0.8717835047,-0.0198558336,3.6379854382\Se,1.0099347491,0.00747
10954,3.9787960273\O,3.7011190053,0.0053786474,1.9680233394\O,1.255440
6765,0.0022105995,-2.0733654099\H,-0.9655332254,-0.0092800668,-0.53530
72639\C,-1.8431701152,-0.0159083755,4.7435086107\C,-3.1244955139,0.551
5381759,4.5678648749\C,-4.0668577795,0.5484884464,5.6000961631\C,-3.74
26885181,-0.0148270859,6.8460876653\C,-2.4705683614,-0.5743122709,7.04
72131042\C,-1.5405324904,-0.5728172892,6.0061966381\O,-4.6208022447,-0
.0408235985,7.8989218887\H,3.363793164,0.0076269061,-0.5898677631\H,-2
.1480430087,-0.055361818,1.903042812\H,3.6073434102,-0.0108044037,2.93
15062353\H,0.354402342,-0.0021318428,-2.4276588166\H,-0.5661335707,-1.
0334962902,6.171989402\H,-2.2300948553,-1.0099450995,8.0160255409\H,-5
.0498724533,0.9977940668,5.4438859088\H,-3.3793289785,1.0198474295,3.6
181749458\H,-5.4553874631,0.3718217371,7.6318714174\\Version=AM64L-G03
RevD.02\State=1-A\HF=-774.5309911\RMSD=4.923e-09\RMSF=8.325e-06\Therma
```

l=0.\Dipole=-1.5671659,0.2212537,0.2831868\PG=C01 [X(C14H10O3Se1)]\

no imaginary frequencies

Sum of electronic and thermal Enthalpies= -774.313047

resvse2

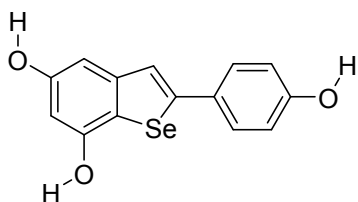

B3lyp/gen pseudo=read opt freq scale=0.9806\\resveratrolo Se\\0,1\C,-0  
.0220717326,-0.0036607459,-0.021240286\C,0.0011982301,-0.0033022287,1.  
3935799395\C,1.243861009,-0.0020296538,2.0767123817\C,2.4506658607,0.0  
027590275,1.3591421761\C,2.4266951175,0.0053201333,-0.0380398329\C,1.1  
885299535,0.001488465,-0.7162511536\C,-1.1381325226,-0.0163691608,2.28  
05069796\C,-0.8617542261,-0.021698834,3.6251195089\Se,1.0205505064,-0.  
0020080737,3.9541766765\O,3.6159407167,0.0052934042,2.0835628454\O,1.2  
538996537,0.0028530849,-2.0904807868\H,-0.9717806697,-0.0084235214,-0.  
5586312759\C,-1.8320824776,-0.0171569079,4.73279826\C,-3.1146402911,0.  
5490646275,4.5624407111\C,-4.0525214456,0.5483085245,5.5989425881\C,-3  
.7229308293,-0.0129665542,6.8442990733\C,-2.4500529567,-0.571974376,7.  
0406185602\C,-1.5244313429,-0.5717545808,5.995434735\O,-4.5974117084,-  
0.03710444,7.9012093208\H,3.3502891963,0.0105570028,-0.6175373101\H,-2  
.158035577,-0.0528661018,1.8985311876\H,4.3712860821,0.0083645928,1.47

72184084\H,0.3544555485,-0.0012262514,-2.4487054676\H,-0.5489596108,-1  
.0311963981,6.1578659334\H,-2.2050695646,-1.0060294517,8.0090611312\H,  
-5.0363466993,0.9973290088,5.4464674233\H,-3.3739494617,1.0156732937,3  
.6130772655\H,-5.4327498614,0.3747487997,7.6354765198\\Version=AM64L-G  
03RevD.02\State=1-A\HF=-774.5334109\RMSD=6.097e-09\RMSF=1.539e-04\Ther  
mal=0.\Dipole=-0.8726241,0.2304144,-0.5402318\PG=C01 [X(C14H10O3Se1)]\

no imaginary frequencies

Sum of electronic and thermal Enthalpies= -774.315415

### resvserad1 (rad 4'-OH)

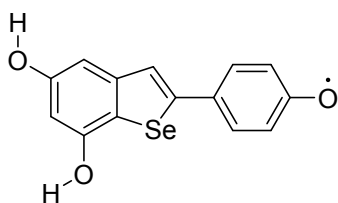

p B3lyp/gen pseudo=read opt freq scale=0.9806\\resveratrolo Se\\0,2\C,  
0.0121714114,0.3613570362,0.0304237892\C,-0.0148641355,-0.0195458731,1  
.4119947916\C,1.2278594102,-0.4021660773,2.0249191006\C,2.4053055707,-  
0.405938034,1.3192611385\C,2.4532151998,-0.0204776341,-0.0923758089\C,  
1.1780402068,0.3657575152,-0.6974824576\C,-1.2480635157,-0.0205165666,  
2.1683695201\Se,-2.9204714075,0.4850776955,1.3789238394\C,-3.698132902  
7,0.1467458722,3.0648783991\C,-2.7443926632,-0.283671877,4.0245506551\  
C,-3.1574839709,-0.5827267715,5.3477793833\C,-4.5042695978,-0.44509413  
17,5.6766775253\C,-5.4558310954,-0.0161093401,4.720737342\C,-5.0519773

829,0.2790114995,3.4171961112\C,-1.4111268422,-0.3651662427,3.50281493  
 22\O,-5.9168211141,0.6987616871,2.4416889831\O,-4.9975329501,-0.710882  
 5436,6.9297983681\O,3.5235991661,-0.0213006318,-0.7443963918\H,-2.4313  
 683413,-0.9140051663,6.0913001626\H,-6.4993790527,0.0774772961,5.02236  
 96358\H,-0.5793788623,-0.6817479871,4.1289695026\H,-6.814496393,0.7511  
 504136,2.8020522167\H,-4.2721936907,-0.9952577141,7.5050975984\H,-0.91  
 8562145,0.6559380877,-0.4567565006\H,1.1952816867,0.6558766851,-1.7477  
 442071\H,3.3476901573,-0.6959829209,1.7837250579\H,1.2349435004,-0.695  
 6700051,3.0731664994\\Version=AM64L-G03RevD.02\State=2-A\HF=-773.89599  
 54\S2=0.791155\S2-1=0.\S2A=0.751316\RMSD=9.306e-09\RMSF=5.063e-06\Ther  
 mal=0.\Dipole=-1.928329,-0.1879268,1.8518188\PG=C01 [X(C14H9O3Se1)]\@

no imaginary frequencies

Sum of electronic and thermal Enthalpies= -773.690924

**resvserad3 (rad 3-OH)**

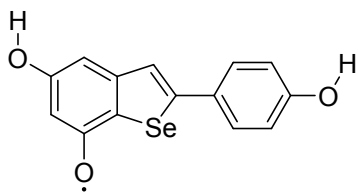

p B3lyp/gen pseudo=read opt freq scale=0.9806\\resveratrolo Se\\0,2\C,  
 0.0071789864,-0.0130780637,-0.0000655339\C,0.0111414277,-0.0032348308,  
 1.4128846863\C,1.2634937056,0.0074895305,2.0652852093\C,2.4586903141,-  
 0.0056198129,1.3408985887\C,2.4283463705,-0.0187052291,-0.0641488315\C  
 ,1.1940469379,-0.0191464512,-0.7343679776\C,-1.2377147013,-0.005167484

9,2.192366264\Se,-2.8433402816,0.7789475326,1.5134514806\C,-3.66048446  
 26,0.2915404167,3.1173166502\C,-2.7644275178,-0.3568387581,3.989922249  
 8\C,-3.2315629425,-0.7932788567,5.2555321836\C,-4.5851625651,-0.570854  
 482,5.6304611285\C,-5.4741763485,0.0682270242,4.7803853682\C,-5.057962  
 0846,0.5379313429,3.4641266462\C,-1.4325707842,-0.5104533992,3.4559906  
 044\O,-5.8479010911,1.1163087961,2.6795924608\O,-5.0527938693,-0.98518  
 33884,6.8529361581\O,3.5646584912,-0.0251888352,-0.829876466\H,-2.5528  
 772465,-1.3006173608,5.9442095438\H,-6.5077974907,0.2340997829,5.07795  
 04785\H,-0.644610446,-1.0229303968,4.0071918727\H,-4.3392510498,-1.415  
 20008,7.3462140921\H,-0.9415709798,-0.0374737268,-0.5370772141\H,1.182  
 0311488,-0.0313902699,-1.8232961257\H,3.416242254,0.0097076343,1.86558  
 45154\H,1.303249416,0.0496210553,3.1529585\H,4.3427082627,-0.023115314  
 6,-0.2529230574\\Version=AM64L-G03RevD.02\State=2-A\HF=-773.8952234\S2  
 =0.785031\S2-1=0.\S2A=0.750868\RMSD=9.131e-09\RMSF=1.749e-05\Thermal=0  
 .\Dipole=2.5164889,-0.9070625,1.0160736\PG=C01 [X(C14H9O3Se1)]\ \@

no imaginary frequencies

Sum of electronic and thermal Enthalpies= -773.690339

### resvserad4 (rad 5-OH)

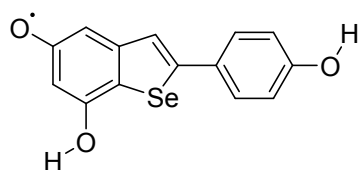

p B3lyp/gen pseudo=read opt freq scale=0.9806\resveratrolo Se\0,2\C,

-0.0072525213,0.0065724937,0.0119176016\C,0.006787002,-0.0070982208,1.  
4246584517\C,1.2638584132,-0.0115721301,2.0687242289\C,2.4532396355,-0  
.0184269738,1.3357173964\C,2.4130579831,-0.0091324248,-0.0694649011\C,  
1.1742601069,0.0067090034,-0.7310028509\C,-1.2350627293,-0.0190986686,  
2.2133746652\Se,-2.8549028714,0.7519288138,1.5239611502\C,-3.668689327  
1,0.2708112866,3.1370888972\C,-2.7569387709,-0.3726053874,4.0264527882  
\C,-3.2064527634,-0.797060973,5.279711687\C,-4.5909823762,-0.583249860  
5,5.6832418723\C,-5.4830521025,0.0828720208,4.736244621\C,-5.029331252  
9,0.4938482448,3.5029400178\C,-1.4249009196,-0.5146532632,3.4750158891  
\O,-5.8025268852,1.1226900105,2.5630380973\O,-5.0005832148,-0.96223476  
88,6.8128584449\O,3.5435340168,-0.0078931487,-0.8428780315\H,-2.548760  
6967,-1.2956803243,5.9907011145\H,-6.5163456812,0.2388464133,5.0484772  
699\H,-0.6331717289,-1.0163699571,4.0298027662\H,-6.7037180448,1.22468  
78872,2.9049954554\H,-0.9593951945,-0.0047254857,-0.5197572\H,1.154694  
8862,0.0123397672,-1.8198567957\H,3.4144140241,-0.0160100929,1.8538343  
759\H,1.3115587683,0.0116085224,3.156529958\H,4.3259613387,-0.02114985  
17,-0.271930962\\Version=AM64L-G03RevD.02\State=2-A\HF=-773.8944482\S2  
=0.78312\S2-1=0.\S2A=0.750764\RMSD=8.249e-09\RMSF=3.795e-06\Thermal=0.  
\Dipole=1.2902923,0.4450776,-1.2368034\PG=C01 [X(C14H9O3Se1)]\@

no imaginary frequencies

Sum of electronic and thermal Enthalpies= -773.689350

**resveratrol**



#p B3l yp/gen opt freq scale=0.9806\\resveratrol\\0,1\C,0.0039059455,0.00073  
62241,-0.0060868493\C,0.0131363827,-0.0003559643,1.4042881575\C,1.2510  
03382,-0.0012451038,2.0845742941\C,2.443295067,-0.0011515425,1.3577357  
776\C,2.4407968098,-0.0001464673,-0.0493602169\C,1.2083664981,0.000802  
709,-0.7196525105\C,-1.2828829136,-0.000444381,2.1006115453\C,-1.47792  
12226,-0.0026610684,3.4409714414\C,-2.7654374631,-0.0026726763,4.14631  
93921\C,-4.0220469036,0.001216693,3.4934211258\C,-5.2166330718,0.00096  
83888,4.210975721\C,-5.1909365564,-0.0031773494,5.6177571427\C,-3.9601  
632697,-0.0069928744,6.2914631353\C,-2.768933105,-0.0066857049,5.55771  
4198\O,-6.3975128275,-0.0032152693,6.271502984\O,3.6164173304,-0.00202  
7692,2.0750049739\O,1.1260393273,0.0018452039,-2.0914054172\H,1.308829  
0794,-0.0018791353,3.1701403135\H,3.3798618417,-0.0000458109,-0.608013  
6051\H,-0.9344909301,0.0014717953,-0.5582308948\H,-2.1503895074,0.0013  
373031,1.4379294234\H,-0.6055504621,-0.0048305535,4.0979308851\H,-1.81  
71558267,-0.0096773752,6.0906658892\H,-3.9345468103,-0.0101691642,7.38  
32810627\H,-6.1796266937,0.0040088268,3.7016607707\H,-4.0682787173,0.0  
046033065,2.4052742119\H,-6.2431598163,-0.0062219045,7.2276732552\H,2.  
0185388881,0.0017648067,-2.4664948861\H,4.366539018,-0.001767067,1.463  
1673136\\Version=AM64L-G03RevD.02\State=1-A\HF=-766.4918642\RMSD=4.266  
e-09\RMSF=4.199e-05\Thermal=0.\Dipole=0.771486,-0.0016545,0.1685338\PG  
=C01

no imaginary frequencies

Sum of electronic and thermal Enthalpies= -766.253731

**resveratrol radical 4'**

B3lyp/gen opt freq scale=0.9806\\resveratrol rad\\0,2\C,-0.0101710466  
,0.0016258408,-0.0022616783\C,-0.0014635437,-0.0003913952,1.4104011978  
\C,1.2348750821,-0.0022472877,2.0973118539\C,2.4285301248,-0.002105691  
3,1.3730894611\C,2.4252436247,-0.0001350916,-0.0347966617\C,1.19557986  
47,0.0017267501,-0.7123487501\C,-1.2906732737,-0.0004206207,2.09830413  
18\C,-1.4892226189,-0.0026061165,3.4558352398\C,-2.7568382639,-0.00261  
61449,4.1348102088\C,-4.0239531341,-0.0000807154,3.4526560138\C,-5.206  
7151394,-0.0002142721,4.1456794551\C,-5.2380520376,-0.0029489895,5.613  
05387\C,-3.9376878952,-0.0054684939,6.2877955805\C,-2.7665473209,-0.00  
52724596,5.5702691802\O,-6.3159857278,-0.0030807586,6.2495297435\O,3.5  
974622383,-0.0039502434,2.0912520119\O,1.1175299411,0.0037159278,-2.08  
14256788\H,1.2898365875,-0.0037455543,3.182774837\H,3.3655855624,-0.00  
00336531,-0.5910637594\H,-0.9478568172,0.0030974339,-0.5552835926\H,-2  
.15959403,0.0014501489,1.4391211225\H,-0.6152400073,-0.004601937,4.109  
4685937\H,-1.8069227621,-0.0071813884,6.090387565\H,-3.9454926438,-0.0  
074906885,7.377605272\H,-6.1698388599,0.0017106055,3.6352281548\H,-4.0  
42352959,0.0020115835,2.363477377\H,2.0093795167,0.0035785113,-2.45845  
3837\H,4.3522017241,-0.0036010346,1.4848577132\\Version=AM64L-G03RevD.  
02\State=2-A\HF=-765.8563596\S2=0.799397\S2-1=0.\S2A=0.751818\RMSD=5.4  
00e-09\RMSF=2.997e-05\Thermal=0.\Dipole=2.8354552,0.0006602,-1.8520363  
\PG=C01 [X(C14H11O3)]\@

no imaginary frequencies

Sum of electronic and thermal Enthalpies= -765.631194

### resveratrol radical 3

B3lyp/gen opt freq scale=0.9806\\resveratrol rad\\0,2\C,-0.023309482,  
0.0013168776,-0.029252856\C,-0.0348940556,-0.0001385025,1.3653363406\C  
,1.2160116334,-0.0013651901,2.048413812\C,2.4442264466,-0.0012605913,1  
.33945028\C,2.469327547,0.00010152,-0.0440533699\C,1.2189686369,0.0014  
688642,-0.7890941476\C,-1.3219295251,-0.0002664738,2.0756353151\C,-1.5  
000401363,-0.002562415,3.4188686106\C,-2.7776012566,-0.0026448905,4.14  
02836579\C,-4.0418597732,0.0010023115,3.5018663964\C,-5.2264507599,0.0  
007046229,4.2343579125\C,-5.1825310598,-0.0032583318,5.6413472203\C,-3  
.9432705656,-0.0068458649,6.3001771279\C,-2.7619083028,-0.0064893389,5  
.5514321106\O,-6.3796360554,-0.0033532384,6.308214512\O,3.5739242936,-  
0.0025450864,2.1168692377\O,1.2107544415,0.0027683931,-2.0499537977\H,  
1.2651405173,-0.0023133741,3.1351140811\H,3.3998008938,0.0002512786,-0  
.6128053556\H,-0.9489329513,0.0023505532,-0.6040469295\H,-2.1948455393  
,0.001583787,1.4208682029\H,-0.6211483065,-0.0047218491,4.0672658707\H  
, -1.8036131739,-0.0093017367,6.0725452804\H,-3.9038754302,-0.009882817  
9,7.3914051846\H,-6.1962053049,0.0035506199,3.7382207143\H,-4.10201903  
77,0.0042189676,2.4144656964\H,-6.2165104963,-0.0062176337,7.263031433  
6\H,4.356026276,-0.0022809934,1.5447310235\\Version=AM64L-G03RevD.02\S  
tate=2-A\HF=-765.8492425\S2=0.799008\S2-1=0.\S2A=0.751651\RMSD=9.505e-  
09\RMSF=2.077e-05\Thermal=0.\Dipole=0.041446,-0.0031249,2.0275574\PG=C  
01 [X(C14H11O3)]\@

no imaginary frequencies

Sum of electronic and thermal Enthalpies= -765.624323

**resvseox1**

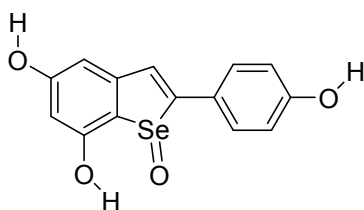

B3lyp/gen pseudo=read opt freq scale=0.9806\\resveratrolo Se ox\\0,1\C  
,0.0007084618,-0.01777826,0.0016260128\C,-0.0009595508,0.0007921557,1.  
4168667774\C,1.2446944622,0.0172775799,2.0835914003\C,2.4447118693,0.0  
0343539,1.3693777247\C,2.4231546672,-0.0191400084,-0.0370590834\C,1.19  
51000587,-0.0270202303,-0.7194138681\C,-1.2639750444,-0.0172491194,2.1  
605334658\Se,-2.8596442274,0.9338356305,1.4415431892\O,-3.5410824306,0  
.1924101652,0.1076664587\O,3.5654326154,-0.0266398856,-0.7914617945\C,  
-1.5212368942,-0.4579908187,3.4205377382\C,-2.9013432647,-0.3502507085  
,3.9054407634\C,-3.3969839687,-0.8029443369,5.1352141587\C,-4.78298447  
01,-0.69981366,5.3795119219\C,-5.6688736795,-0.1912228268,4.4172293872  
\C,-5.163427578,0.2627165368,3.1865736124\C,-3.7821021369,0.2290273363  
,2.9714851806\H,-2.7347511235,-1.2443064473,5.8816945105\O,-6.04107967  
93,0.7090991744,2.2426967386\O,-5.3383646398,-1.1234800118,6.557733193  
1\H,-6.7396058562,-0.1792924879,4.6098986285\H,-0.7555906519,-0.927896  
7013,4.0411198611\H,-5.6248111292,0.6490644675,1.3623838972\H,-4.64354  
13087,-1.4777610776,7.1319060776\H,1.2745450525,0.0613733102,3.1717937

73\H,3.3990924404,0.0243318971,1.8996103582\H,1.1940275142,-0.04677383  
 14,-1.8082470471\H,-0.9465822272,-0.0492691715,-0.537712138\H,4.338829  
 518,-0.0216251562,-0.2081661433\\Version=AM64L-G03RevD.02\State=1-A\HF  
 =-849.7112103\RMSD=3.568e-10\RMSF=2.065e-05\Thermal=0.\Dipole=2.151709  
 7,-0.1489944,1.7534318\PG=C01 [X(C14H10O4Se1)]\@

no imaginary frequencies

Sum of electronic and thermal Enthalpies= -849.488920

### resvseox2

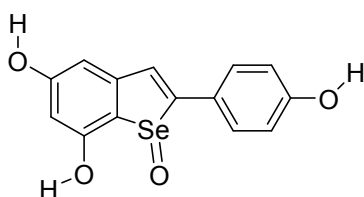

B3lyp/gen pseudo=read opt freq scale=0.9806\\resveratrolo Se ox\\0,1\C  
 ,0.0081023951,-0.0742409924,-0.0273503426\C,-0.0320462706,-0.008768769  
 2,1.3861656151\C,1.1931509728,0.0815368089,2.0837478161\C,2.4126375622  
 ,0.0955462466,1.4021357938\C,2.4300331331,0.0245683633,-0.0021381476\C  
 ,1.2223061971,-0.0585878871,-0.7147951712\C,-1.3084786517,-0.048749537  
 1,2.1091207969\Se,-2.9374646907,0.7687138188,1.3059624273\O,-3.3793572  
 65,-0.1816120117,0.0160773324\O,3.5929991728,0.0400351497,-0.726509366  
 3\C,-1.5662728482,-0.5380582261,3.347042138\C,-2.9458909767,-0.4403648  
 333,3.8324895967\C,-3.4040528343,-0.88475839,5.0812853605\C,-4.7678200  
 451,-0.7291644249,5.3924766524\C,-5.6585204166,-0.1261595601,4.4915383  
 081\C,-5.1835355199,0.3335188432,3.2495058279\C,-3.8370752799,0.157660

5779,2.9182432534\H,-2.7212610372,-1.3434887222,5.7982211251\O,-5.9939  
 927493,0.9535119029,2.3430295275\O,-5.2943024013,-1.1501392616,6.58457  
 15673\H,-6.7075874406,-0.0210551939,4.7690631622\H,-0.8018958703,-1.02  
 21496004,3.9581870387\H,-6.8997292878,0.9896352971,2.6842559586\H,-4.5  
 961514381,-1.559323954,7.1167778847\H,1.1899149838,0.1641734747,3.1702  
 335516\H,3.3503762454,0.1752431083,1.9561191135\H,1.2520921123,-0.1169  
 355761,-1.8019372293\H,-0.9234434819,-0.1674984061,-0.585756307\H,4.34  
 80561753,0.0972889478,-0.122476681\\Version=AM64L-G03RevD.02\State=1-A  
 \HF=-849.7083254\RMSD=5.757e-09\RMSF=3.879e-06\Thermal=0.\Dipole=0.974  
 2727,0.1916666,2.3797034\PG=C01 [X(C14H10O4Se1)]\@

no imaginary frequencies

Sum of electronic and thermal Enthalpies= -849.486175

### resvseoxrad1

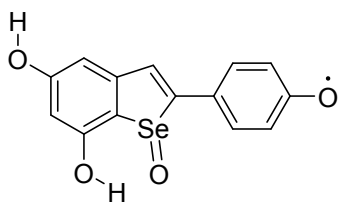

p B3lyp/gen pseudo=read opt freq scale=0.9806\\resveratrolo Se ox\\0,2

\C,0.0157039215,0.3435656395,0.0057803915\C,-0.0287318452,0.0140350249  
 ,1.4029499388\C,1.2049596596,-0.3462151546,2.0551455508\C,2.3949009248  
 ,-0.3547571278,1.376462913\C,2.4659997033,-0.0041087571,-0.0466847013\  
 C,1.1978237457,0.3398957813,-0.6941777896\C,-1.2709230162,0.0209270303

,2.1259465222\Se,-2.9377290436,0.7705515488,1.3160746558\O,-3.55782439  
82,-0.1552481097,0.0764241798\O,3.5498891962,-0.002420625,-0.670331224  
1\C,-1.5078665573,-0.3042531751,3.4438762323\C,-2.8860245082,-0.260343  
1578,3.9064858539\C,-3.3536086545,-0.6201232666,5.1808965559\C,-4.7430  
518865,-0.5986373002,5.4135477342\C,-5.6573947486,-0.2614681609,4.4002  
809568\C,-5.1828611088,0.1009541415,3.1271651478\C,-3.8018722528,0.149  
6588922,2.9147944174\H,-2.6629054765,-0.9281441131,5.9670259128\O,-6.0  
871648159,0.3797797755,2.1478145208\O,-5.2789327023,-0.936480168,6.624  
7011754\H,-6.7272705867,-0.3115784781,4.5921961398\H,-0.7128808664,-0.  
617783057,4.1213526475\H,-5.6686951628,0.2580436269,1.2745992763\H,-4.  
5702670819,-1.1764836566,7.2399534051\H,1.1896862882,-0.6084543475,3.1  
121033625\H,3.3323247943,-0.6171592847,1.8665828146\H,1.2336450268,0.5  
839296395,-1.7554908727\H,-0.9124840323,0.5747400864,-0.5180546419\\Ve  
rsion=AM64L-G03RevD.02\State=2-A\HF=-849.0710898\S2=0.804106\S2-1=0.\S  
2A=0.752188\RMSD=2.364e-09\RMSF=1.077e-05\Thermal=0.\Dipole=-0.3812041  
,0.0877039,2.656123\PG=C01 [X(C14H9O4Se1)]\@

no imaginary frequencies

Sum of electronic and thermal Enthalpies= -848.861990

**resvseoxrad2**

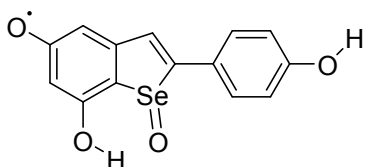

```
p B3lyp/gen pseudo=read opt freq scale=0.9806\\resveratrolo Se ox\\0,2
\C,-0.0169039747,0.0299203429,0.016576926\C,-0.0028093961,0.0077673734
,1.4317249732\C,1.250275955,-0.0228635844,2.0852339653\C,2.440790616,-
0.0386885562,1.3573072543\C,2.4038753136,-0.0187320672,-0.0496384956\C
,1.1685135696,0.0177551445,-0.7182512065\C,-1.2556939184,-0.002634936,
2.1901442224\Se,-2.8459886136,0.9621180155,1.4788423171\O,-3.585320973
3,0.2184529958,0.1759272807\O,3.535396637,-0.0269904517,-0.8161271863\
C,-1.5020032125,-0.4345909748,3.4567142556\C,-2.8763767636,-0.33656550
74,3.9566296569\C,-3.3781675016,-0.776687615,5.1664255891\C,-4.8185417
802,-0.6955488193,5.4224992541\C,-5.6956398887,-0.2048862823,4.3617766
073\C,-5.1701831582,0.2298186867,3.1476202763\C,-3.7683497052,0.242851
7469,3.0047876045\H,-2.751727635,-1.2091982682,5.9453789299\O,-5.99279
82564,0.6376853724,2.1419929754\O,-5.2978117538,-1.0787015255,6.521566
0467\H,-6.7699103192,-0.2158690608,4.5377534228\H,-0.7292787408,-0.896
4355752,4.073619813\H,-5.5253590665,0.5458191385,1.2864826756\H,1.2942
759651,-0.013585235,3.1736509835\H,3.4008217885,-0.0534555898,1.877071
4987\H,1.155216183,0.0287043092,-1.8070186626\H,-0.9689242861,0.028628
9975,-0.5154600789\H,4.3169222779,-0.0572464758,-0.2442619227\\Version
=AM64L-G03RevD.02\State=2-A\HF=-849.0646661\S2=0.797223\S2-1=0.\S2A=0.
751566\RMSD=7.901e-09\RMSF=1.167e-05\Thermal=0.\Dipole=2.7606351,0.464
7984,-0.0744966\PG=C01 [X(C14H9O4Se1)]\@
```

no imaginary frequencies



Sum of electronic and thermal Enthalpies= -848.855729

**resvseoxrad3**

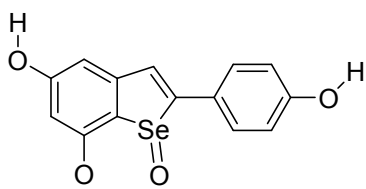

p B3lyp/gen pseudo=read opt freq scale=0.9806\\resveratrolo Se ox\\0,2  
\\C,0.0151975794,-0.0435831848,-0.0308368913\\C,-0.0214428918,-0.0024461  
23,1.3839906276\\C,1.206072426,0.0547249621,2.0818786653\\C,2.4240894647  
,0.0604995615,1.3989960033\\C,2.4382383642,0.0130555537,-0.0069255184\\C  
,1.228159505,-0.0376166074,-0.7194456227\\C,-1.2964075905,-0.0340397849  
,2.1068838532\\Se,-2.9229147689,0.8041078611,1.3102561784\\O,-3.36700854  
14,-0.1242351611,0.0084554214\\O,3.598380827,0.0214165396,-0.7323984215  
\\C,-1.557866512,-0.5189285612,3.3470395916\\C,-2.9426350434,-0.41007942  
44,3.8179171498\\C,-3.4224466902,-0.8588748476,5.0725790542\\C,-4.795979  
0707,-0.710943712,5.4061892257\\C,-5.6825705045,-0.1053343667,4.5266386  
375\\C,-5.2242388122,0.403852249,3.2394278749\\C,-3.826235756,0.18244530  
79,2.9173012221\\H,-2.7385575851,-1.3259139765,5.7844952509\\O,-6.001313  
9566,1.0172448567,2.4611467413\\O,-5.2852739136,-1.1529488186,6.6053042  
068\\H,-6.732543972,0.0179991571,4.7850054903\\H,-0.7997167464,-1.005111  
8739,3.9639511125\\H,-4.5765480808,-1.5657421218,7.120444333\\H,1.206355  
8863,0.1188923879,3.169587879\\H,3.3637314812,0.1154737913,1.9524949619  
\\H,1.255860332,-0.0775568869,-1.8073889296\\H,-0.9179295221,-0.11134778  
14,-0.5902413934\\H,4.3569091226,0.0570602711,-0.1308646355\\Version=AM

64L-G03RevD.02\State=2-A\HF=-849.0584922\S2=0.798509\S2-1=0.\S2A=0.751  
663\RMSD=5.734e-09\RMSF=2.020e-05\Thermal=0.\Dipole=2.6571079,-0.43959  
82,2.6745275\PG=C01 [X(C14H9O4Se1)]\@

no imaginary frequencies

Sum of electronic and thermal Enthalpies= -848.849883

### resvsecl3

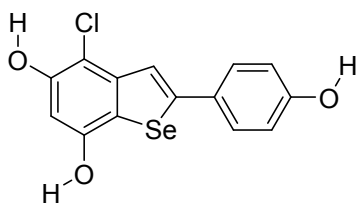

p B3lyp/gen pseudo=read opt freq scale=0.9806\\resveratrolo Se Cl\\0,1  
\C,-0.0083317221,-0.0001634014,-0.0198717364\C,-0.0123010594,-0.001218  
9926,1.3952024981\C,1.2352594548,-0.0043936746,2.0708172593\C,2.445785  
4631,-0.0033458966,1.3591682842\C,2.4274410558,0.0011734114,-0.0362600  
883\C,1.1976644999,0.0023376889,-0.7311390754\C,-1.1497645243,-0.01308  
57525,2.2802380824\C,-0.8653486025,-0.0201881578,3.624157594\Se,1.0150  
680326,-0.0050032188,3.9477498779\O,3.6059905659,-0.0061314205,2.09004  
39823\O,1.2572957434,0.006003533,-2.09379045\Cl,-1.5157908582,0.000519  
2816,-0.9282293662\C,-1.8330898184,-0.0146320548,4.7335240298\C,-3.118  
0223388,0.5459750259,4.5621153108\C,-4.0533682034,0.5461664588,5.60040  
91375\C,-3.719234448,-0.0087240451,6.847650135\C,-2.443803012,-0.56221  
20336,7.0444898279\C,-1.5203362431,-0.5627690593,5.9977508952\O,-4.591

3943746,-0.0323220875,7.9053343002\H,3.3504690966,0.0046492102,-0.6163  
055451\H,-2.1684279943,-0.0470494356,1.9004401208\H,4.3657858975,-0.00  
62750364,1.4895235592\H,0.3499638937,0.0068007209,-2.4437963917\H,-0.5  
43235633,-1.0187746863,6.1605446872\H,-2.1957897259,-0.9914716854,8.01  
42269979\H,-5.0392651774,0.9904246027,5.4478652634\H,-3.3814861147,1.0  
065954438,3.6111161964\H,-5.4298704749,0.3730999245,7.6393443055\\Vers  
ion=AM64L-G03RevD.02\State=1-A\HF=-788.8925189\RMSD=5.216e-09\RMSF=1.1  
34e-05\Thermal=0.\Dipole=-0.3946831,0.2306977,0.0270574\PG=C01 [X(C14H  
9Cl1O3Se1)]\@

no imaginary frequencies

Sum of electronic and thermal Enthalpies= -788.682197

#### resvseclrad4 (4')

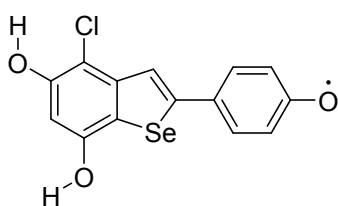

B3lyp/gen pseudo=read opt freq scale=0.9806\\Se Cl resv rad\\0,2\

C,-0.0068372268,-0.0804709045,-0.0201569167\C,-0.0125973106,-0.0333016  
804,1.3970643597\C,1.2318871451,0.0381303241,2.0788236744\C,2.44500821  
85,0.0618705543,1.3706034245\C,2.4280299785,0.014604305,-0.0233431282\  
C,1.2010477477,-0.0568062978,-0.7244432547\C,-1.1467792923,-0.04843276  
02,2.2716302355\C,-0.8705141547,0.0077120309,3.6304974826\Se,1.0149668

811,0.0923192567,3.952137971\O,3.5978784649,0.131555879,2.1054832116\O  
,1.2732552188,-0.0994059092,-2.0832069381\Cl,-1.5075755065,-0.16948963  
82,-0.927336225\C,-1.8320114084,0.0061889246,4.7125399916\C,-3.2426047  
751,-0.057359484,4.444630768\C,-4.1659600657,-0.0595684014,5.460443524  
2\C,-3.758095862,0.0026938039,6.865252901\C,-2.3175645323,0.0668383656  
,7.1162541212\C,-1.4128093142,0.0677212167,6.0816372765\O,-4.593590981  
6,0.0011673786,7.7991494691\H,3.3516271027,0.0313850197,-0.6022635965\  
H,-2.1591029799,-0.1011114483,1.8807901741\H,4.3641328207,0.1415632203  
,1.5129432585\H,0.3714847728,-0.1467985818,-2.4445928164\H,-0.34686193  
13,0.1165618778,6.3095268067\H,-1.9970650291,0.113643184,8.1566905574\  
H,-5.2358450481,-0.1077021652,5.2584374057\H,-3.5856133984,-0.10473722  
91,3.4127427993\\Version=AM64L-G03RevD.02\State=2-A\HF=-788.2539994\S2  
=0.792045\S2-1=0.\S2A=0.751376\RMSD=8.680e-10\RMSF=5.333e-06\Thermal=0  
.\Dipole=1.6976226,0.0070983,-1.7735127\PG=C01 [X(C14H8Cl1O3Se1)]\@

no imaginary frequencies

Sum of electronic and thermal Enthalpies= -788.056680

### resvseclrad2 (3)

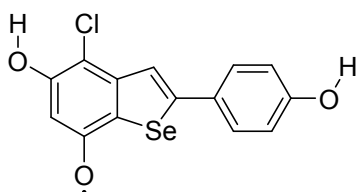

#p B3lyp/gen pseudo=read opt freq scale=0.9806\\Se Cl resv rad 3\\0,

2\C,0.0050999248,-0.2151766463,0.0142677233\C,-0.0028727635,0.00101424

01,1.4103226484\C,1.238418286,0.2105206098,2.0516004675\C,2.4374336772  
,0.214369864,1.3380274945\C,2.4214269912,0.0090164454,-0.0515833684\C,  
1.1984037512,-0.2059228203,-0.7112458942\C,-1.2723566963,0.0091131084,  
2.1507431362\C,-2.5240251431,0.3030411757,1.6833483182\C,-3.6075210712  
,0.2052261077,2.6350527788\C,-3.1927891659,-0.1806460378,3.9440302715\  
C,-4.1223141018,-0.3123092799,5.0231089359\C,-5.4579448742,-0.07383632  
12,4.7979867883\C,-5.965168025,0.3176633909,3.4886261434\C,-4.97118363  
92,0.4529264284,2.4067848701\Se,-1.3355698349,-0.4750593869,4.00557505  
51\O,-3.7279476282,-0.6783895736,6.2820620472\O,-7.1819020035,0.531946  
3682,3.2920091457\Cl,-5.5359249259,0.9228749657,0.8445518439\O,3.62310  
00038,0.0223714731,-0.7060161678\H,-6.1812799097,-0.1706818093,5.60519  
09392\H,-2.7002785884,0.6224902671,0.658943941\H,-2.7637468703,-0.7467  
569202,6.3372639844\H,1.2688891863,0.397107404,3.1258462226\H,3.390149  
6023,0.3815866368,1.8382561956\H,1.1833283378,-0.3802169593,-1.7889731  
742\H,-0.9307723218,-0.4121738318,-0.5064661888\H,3.4788792713,-0.1252  
994302,-1.652557242\\Version=AM64L-G03RevD.02\State=2-A\HF=-788.245854  
4\S2=0.783949\S2-1=0.\S2A=0.750794\RMSD=5.899e-09\RMSF=9.083e-06\Therm  
al=0.\Dipole=2.8359914,-0.4117739,-0.7226098\PG=C01 [X(C14H8Cl1O3Se1)]  
\@

no imaginary frequencies

Sum of electronic and thermal Enthalpies= -788.048761

**resvseclrad5 (5)**

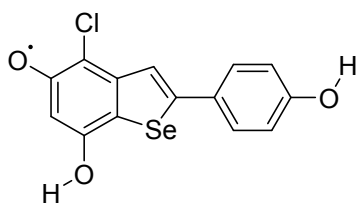

```
#p B3lyp/gen pseudo=read opt freq scale=0.9806\\Se Cl resv rad\\0,2\
C,-0.0060870922,-0.0024060236,-0.0207132959\C,-0.0121482528,-0.0002777
12,1.3857559734\C,1.2359171394,-0.0034481923,2.0689950368\C,2.48023298
36,-0.0051250166,1.3687897687\C,2.4921661888,-0.0041543448,-0.00507026
37\C,1.2568377634,-0.0028859571,-0.7858331995\C,-1.154500705,-0.007372
6766,2.2711656286\C,-0.8756871214,-0.0093577063,3.612776145\Se,1.01566
58487,0.0017734322,3.9255689821\O,3.6007955454,-0.0067375914,2.1541498
092\O,1.270345262,-0.0018632962,-2.0353221826\Cl,-1.4851231857,-0.0011
026235,-0.9110719709\C,-1.833092219,0.0064059611,4.7290929904\C,-3.125
2668904,0.5500882168,4.5552404867\C,-4.0535060255,0.5572901956,5.59895
81162\C,-3.7054482683,0.0269205466,6.8536328339\C,-2.4223137416,-0.508
7694027,7.0522220482\C,-1.5055284579,-0.5165502218,6.0001370608\O,-4.5
690424197,0.0112364324,7.9160163333\H,3.4235018277,-0.0032435146,-0.57
223767\H,-2.1703116442,-0.0391882713,1.8846587596\H,4.389406408,-0.008
2021648,1.5905160411\H,-0.5227351707,-0.9591314007,6.1668634087\H,-2.1
638389969,-0.9185109183,8.0275362884\H,-5.0451601016,0.9876126049,5.44
4989981\H,-3.4004677397,0.9908746345,3.5982278596\H,-5.4150254675,0.40
17599485,7.65098895\\Version=AM64L-G03RevD.02\State=2-A\HF=-788.251252
3\S2=0.780063\S2-1=0.\S2A=0.750619\RMSD=7.359e-09\RMSF=6.915e-06\Therm
al=0.\Dipole=-0.4100777,0.2306501,1.9871703\PG=C01 [X(C14H8Cl1O3Se1)]\
\@
```

no imaginary frequencies

Sum of electronic and thermal Enthalpies= -788.053890

### resvSeCl22

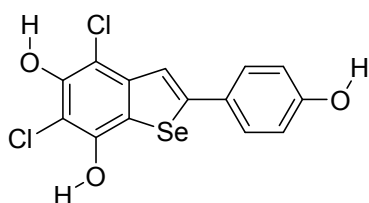

```
p B3lyp/gen pseudo=read opt freq scale=0.9806\\resveratrolo Se Cl2\\0,  
1\C,-0.0055111595,0.0001090668,-0.0212883652\C,-0.0130955666,-0.001896  
4788,1.3925084324\C,1.2332787376,-0.0058496076,2.0688794013\C,2.450204  
3255,-0.0028587318,1.37158715\C,2.4207419768,0.0028674657,-0.030709650  
7\C,1.1958296614,0.0041720065,-0.7425869953\C,-1.1515352772,-0.0149119  
117,2.2758257852\C,-0.8678744481,-0.023546468,3.6198449391\Se,1.012721  
78,-0.0074908119,3.9456560124\O,3.6068315347,-0.0050144383,2.087373059  
2\O,1.2493532815,0.0089290376,-2.099226631\Cl,-1.5100293703,0.00078711  
41,-0.9315206517\C,-1.8342414382,-0.0184703242,4.7299367073\C,-3.11977  
98076,0.5411925332,4.5596290187\C,-4.0532173746,0.5422653242,5.5994686  
712\C,-3.7165051606,-0.010881421,6.8469240232\C,-2.4405074263,-0.56402  
06333,7.0421851592\C,-1.5188451327,-0.565220354,5.9941243789\O,-4.5858  
142319,-0.0333682246,7.9061361394\Cl,3.9349937266,0.011054277,-0.90327  
77181\H,-2.1699167939,-0.0482926934,1.8954746616\H,4.3585403602,-0.002  
2575955,1.4691712493\H,0.3387817673,0.0082431735,-2.4416275784\H,-0.54  
14992936,-1.0210237398,6.1560739183\H,-2.1908131355,-0.9922122924,8.01
```

19212924\H,-5.0395115285,0.9858223155,5.4480302272\H,-3.3852076787,1.0  
 007238311,3.6086142506\H,-5.4246230101,0.3734260505,7.6431255668\\Vers  
 ion=AM64L-G03RevD.02\State=1-A\HF=-803.2477078\RMSD=8.179e-09\RMSF=1.5  
 51e-06\Thermal=0.\Dipole=-1.054992,0.2302738,0.3493258\PG=C01 [X(C14H8  
 Cl2O3Se1)]\@

no imaginary frequencies

Sum of electronic and thermal Enthalpies= -803.045152

#### resvSeCl2rad6 (4')

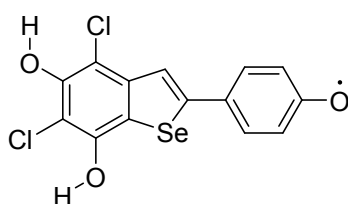

B3lyp/gen pseudo=read opt freq scale=0.9806\\Se Cl2 resv rad\\0,2

\C,-0.018833558,-0.0001541409,0.001403757\C,-0.007024819,-0.0002302682  
 ,1.4345184751\C,1.2689380835,0.0000437452,2.0960914938\C,2.4437452033,  
 0.0000464854,1.38605873\C,2.4530433506,-0.0008579917,-0.0781675069\C,1  
 .1434719706,-0.0001480741,-0.7319289449\C,-1.2380769284,-0.0001791912,  
 2.1956395011\Se,-2.9522308132,-0.0001237698,1.3415566409\C,-3.69832723



31,-0.0000712684,3.0743702571\C,-2.7026535188,-0.0000762828,4.08672982  
 \C,-3.1186769298,-0.0000360599,5.4412373452\C,-4.4763588306,0.00000984  
 02,5.7791687496\C,-5.4429108875,0.0000145399,4.7387451673\C,-5.0657419  
 76,-0.0000250798,3.3880229143\Cl,-1.9436100556,-0.0000406749,6.7446606  
 807\C,-1.3642218249,-0.0001240181,3.5775658464\O,-5.9610735473,-0.0000  
 222519,2.3663412595\Cl,-7.1408666346,0.0000740164,5.1346943154\O,-4.92  
 72508739,0.0000528003,7.0573860626\O,3.5203620013,0.0004766436,-0.7342  
 627841\H,-0.5067602225,-0.0001356898,4.2445460195\H,-6.8627269557,0.00  
 00117225,2.7330931291\H,-4.1610469108,0.0000452993,7.6570556688\H,-0.9  
 759706175,-0.0000393641,-0.5225431977\H,1.1328141909,0.0000846319,-1.8  
 21534121\H,3.4122353806,0.0004346899,1.8858302961\H,1.3044215693,0.000  
 3286936,3.1840089589\\Version=AM64L-G03RevD.02\State=2-A\HF=-802.60861  
 97\S2=0.79263\S2-1=0.\S2A=0.751416\RMSD=1.429e-09\RMSF=6.469e-05\Therm  
 al=0.\Dipole=-1.4613753,-0.00041,1.1134844\PG=C01 [X(C14H7Cl2O3Se1)]\  
 @

no imaginary frequencies

Sum of electronic and thermal Enthalpies= -802.419116

### resvSeCl2rad3 (3)

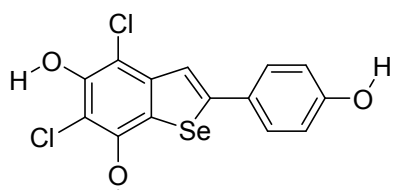

B3lyp/gen pseudo=read opt freq scale=0.9806\\Se Cl2 resv rad\\0,2

\C,0.019525546,-0.0039012869,-0.0043524153\C,0.0038211453,-0.004578073  
1,1.4192971447\C,1.2351707501,-0.0033465255,2.1005716249\C,2.534673618  
6,0.0021559106,1.4418821355\C,2.4577159862,0.0063168157,-0.0254179015\  
C,1.2531824592,0.0033502559,-0.7261622325\C,-1.1475789248,-0.019512668  
,2.2842065105\C,-0.8725938373,-0.0248384992,3.6324889124\Se,1.00740672  
76,-0.0024300064,3.9522904442\O,3.6123860154,0.0034186777,2.0665076222  
\O,1.186940347,0.0073706047,-2.0788123905\Cl,-1.4583930449,-0.00879596  
79,-0.9000210008\C,-1.8433217415,-0.0191713019,4.7383941076\C,-3.12590  
85315,0.5452763481,4.5624770713\C,-4.0639839269,0.5473119894,5.5979125  
27\C,-3.7348823294,-0.0102873044,6.8456135804\C,-2.4615069807,-0.56876  
37499,7.0456619916\C,-1.5351704017,-0.5709011578,6.0021839349\O,-4.607  
9226132,-0.0328429027,7.9001528114\Cl,3.942762848,0.0170161502,-0.9254  
527367\H,-2.16177853,-0.0562021527,1.893520266\H,2.0962306595,0.012779  
4029,-2.4280449111\H,-0.5605349744,-1.0310557284,6.1684690915\H,-2.218  
2726606,-1.0006100772,8.0153414267\H,-5.0478924968,0.9946609,5.4429290  
543\H,-3.3854509674,1.0080473306,3.6113546512\H,-5.4450628911,0.376937  
4915,7.6361538804\\Version=AM64L-G03RevD.02\State=2-A\HF=-802.610326\S  
2=0.779736\S2-1=0.\S2A=0.750619\RMSD=9.657e-09\RMSF=7.140e-06\Thermal=  
0.\Dipole=-1.9815787,0.2327447,0.2547834\PG=C01 [X(C14H7Cl2O3Se1)]\@

no imaginary frequencies

Sum of electronic and thermal Enthalpies= -802.420726

**resvSeCl2rad5 (5)**

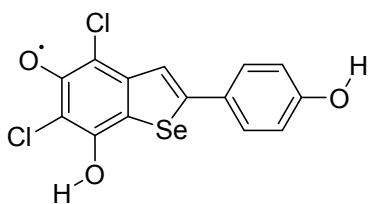

```

B3lyp/gen pseudo=read opt freq scale=0.9806\\Se Cl2 resv rad\\0,2
\\C,-0.0320351556,0.0097816845,-0.0349134522\\C,-0.0355785152,-0.0005494
519,1.3691975032\\C,1.2143684137,-0.0143810993,2.0500085278\\C,2.4609697
781,-0.012545344,1.3605815099\\C,2.458784989,0.0008120433,-0.0203357615
\\C,1.2218303796,0.0132254103,-0.8156750171\\C,-1.1758976666,-0.01218977
08,2.257576521\\C,-0.8934459605,-0.0277456959,3.5979761685\\Se,0.9999782
047,-0.0255197157,3.9067718219\\O,3.5845861435,-0.0237758679,2.12249491
34\\O,1.228880242,0.026040013,-2.0587620474\\Cl,-1.5096770692,0.02309922
43,-0.9250511576\\C,-1.8444850718,-0.0184277018,4.7191621257\\C,-3.13665
55917,0.5289066007,4.5564728236\\C,-4.0582986392,0.5311600167,5.6058618
308\\C,-3.7033730664,-0.008126893,6.8549674398\\C,-2.4202055759,-0.54832
09673,7.042018918\\C,-1.5099528112,-0.550772704,5.9845664688\\O,-4.55925
25191,-0.0287560452,7.9226860297\\Cl,3.9803724212,0.0063822843,-0.86325
56907\\H,-2.1928784064,-0.0367407705,1.8737587786\\H,4.3595188006,-0.021
3658142,1.5317576198\\H,-0.5272452548,-0.9967460038,6.1426219266\\H,-2.1
567736346,-0.9651848297,8.0129484763\\H,-5.0499072229,0.9644869024,5.46
08499442\\H,-3.4168123615,0.9767065796,3.6041447782\\H,-5.4059019305,0.3
670601042,7.6676411741\\Version=AM64L-G03RevD.02\\State=2-A\\HF=-802.608
1586\\S2=0.778937\\S2-1=0.\\S2A=0.750575\\RMSD=8.078e-10\\RMSF=1.095e-05\\Th
ermal=0.\\Dipole=-1.0203013,0.2143929,2.2638998\\PG=C01 [X(C14H7Cl2O3Se1)]\\@

```

no imaginary frequencies

Sum of electronic and thermal Enthalpies= -802.418493
